# Supplementary material for: Unraveling a fine-scale high genetic heterogeneity and recent continental connections of an Arabian Peninsula population
Source: PubMed Central journal article supplement (PMC8904638; doi:10.1038/s41431-021-00861-6), 2021-03-22
Supplement: 41431_2021_861_MOESM1_ESM.pdf [file 41431_2021_861_MOESM1_ESM.pdf]

## Unraveling a fine-scale high genetic heterogeneity and recent continental connections of an Arabian Peninsula population

Muthukrishnan Eaaswarkhanth<sup>1,\*</sup>, Ajai K Pathak<sup>2,3,\*</sup>, Linda Ongaro<sup>2,3</sup>, Francesco Montinaro<sup>2,4</sup>, Prashantha Hebbar<sup>1</sup>, Osama Alsmadi<sup>1,5</sup>, Mait Metspalu<sup>2</sup>, Fahd Al-Mulla<sup>1</sup>, Thangavel Alphonse Thanaraj<sup>1</sup>

<sup>1</sup>*Department of Genetics and Bioinformatics, Dasman Diabetes Institute, P.O. Box 1180, Dasman 15462, Kuwait.*

<sup>2</sup>*Estonian Biocentre, Institute of Genomics, University of Tartu, Riia 23b, Tartu 51010, Estonia.*

<sup>3</sup>*Department of Evolutionary Biology, Institute of Molecular and Cell Biology, Riia 23b, Tartu 51010, Estonia.*

<sup>4</sup>*Department of Biology-Genetics, University of Bari, Bari, Italy.*

<sup>5</sup>*OA is currently affiliated with King Hussein Cancer Center, Amman, Jordan.*

*\*These authors contributed equally to this work*

### Corresponding Authors:

Thangavel Alphonse Thanaraj, Department of Genetics and Bioinformatics, Dasman Diabetes Institute, Kuwait, +965 2224 2999 Ext. 3320, [alphonse.thangavel@dasmaninstitute.org](mailto:alphonse.thangavel@dasmaninstitute.org).

Fahd Al-Mulla, Department of Genetics and Bioinformatics, Dasman Diabetes Institute, Kuwait, +965 2224 2999 Ext. 2211, [fahd.almulla@dasmaninstitute.org](mailto:fahd.almulla@dasmaninstitute.org).

## **Supplementary Text**

Detailed Materials and methods section.

## **Supplementary Figures**

**Supplementary Fig. 1.** (A) Geographical location of the populations included in the study. (B) Sample information, quality control measures and the population genetics analyses performed in the study.

**Supplementary Fig. 2.** The mean pairwise  $F_{ST}$  values showing genetic distance between individual populations.

**Supplementary Fig. 3.** Principal Component Analysis plot representing the first two principal components, PC1 and PC2, accounting for 2.11% and 1.72% of the variation respectively.

**Supplementary Fig. 4.**  $f_3$  -statistics with Papuans as outgroup, comparing the genetic affinity of the Kuwaiti population subgroups to other modern populations.

**Supplementary Fig. 5.** Intra cluster Total Variation Distance for number and length of genomic fragments among the 40 clusters inferred by fineSTRUCTURE. (A) TVD estimated on number of fragments. (B) TVD estimated on length of fragments.

**Supplementary Fig. 6.** Intra cluster Total Variation Distance for number and length of genomic fragments among Kuwaiti individuals from the same cluster. Lower boxplots refer to TVD estimated on number of fragments and the upper boxplots refer to TVD estimated on length of fragments.

**Supplementary Fig. 7.** Ancestry proportions of the main eight Kuwait clusters as inferred by NNLS analysis using North/East Europe, Bedouins, Yoruba, Druze and North Africa clusters as putative sources.

**Supplementary Fig. 8.** Inferred admixture sources and times by GLOBETROTTER population based analysis. (A) The x and y axes show the minor and major sources, respectively, as inferred by GLOBETROTTER. (B) Type of admixture.

## **Supplementary Tables**

**Supplementary Table 1.** Details of the populations included in the study.

**Supplementary Table 2.**  $f_4$ -statistics comparing the genetic affinity of the Kuwait population subgroups to other modern populations.

**Supplementary Table 3.**  $f_4$ -statistics for relative allele sharing of the Kuwait population subgroups to ancient West Eurasian individuals.

**Supplementary Table 4.**  $f_4$ -ratio estimates of Neanderthal ancestry in the Kuwait population.

**Supplementary Table 5.** Time of admixture estimate using ALDER.

## **Supplementary Text**

### **Materials and methods**

#### **Samples**

We included samples of 620 Kuwaiti individuals from the State of Kuwait who were part of a larger cohort collected for studies of metabolic disorders [1–3]. The participants were recruited through the following means: (i) from visitors to clinics and Open Day Events at our institute (ii) from visitors to our campaigns at malls, primary health centers and blood banks in each of the five governorates of the State of Kuwait, and (iii) from visitors to our campaigns at Kuwait University, where students are enrolled from all the governorates. All participants were healthy and enrolled after obtaining written informed consent. The study protocol was approved by the Ethical Review Committee of the Dasman Diabetes Institute, Kuwait. Participant recruitment, sample collection, and related procedures were conducted in accordance with the tenets of the Declaration of Helsinki, as detailed elsewhere [1–3]. Each of the 620 individuals were assigned to subgroups (Kuwait-P, Kuwait-S and Kuwait-B) based on their surnames that inform their respective ancestral lineage i.e., Persian, Saudi Arabian Tribe, and Bedouin. The surname lineage classification was described in detail in our previous study [1].

#### **Genotyping and quality control**

All the 620 individuals were genotyped using HumanOmniExpress arrays for 730,525 SNPs (Illumina, Inc., San Diego, CA, USA) in accordance with the manufacturers' protocol. Quality control checks and data filtering were conducted using the PLINK (version 1.9) whole genome data analysis toolset [4]. The dataset was filtered to contain only autosomal SNPs with a genotyping success rate of >90%, a minor allele frequency of >5%, and a probability ( $p$ ) value of >0.001 as determined using the Hardy–Weinberg exact test. Only samples with a genotyping success rate of >90% were included for analysis. To ensure that the study individuals are unrelated, we examined relatedness among them using the “–genome” feature in PLINK with the threshold  $PI\_HAT > 0.125$  i.e., up to third degree relatives and randomly removed one sample per pair of related individuals. After QC and relatedness filtering, 583 individuals and 587,819 SNPs met the inclusion criteria for analysis (Supplementary Fig. 1). Genotype data has been deposited at the European Genome-phenome Archive (EGA), which is hosted by the European Bioinformatics

Institute (EBI) and the Centre for Genomic Regulation (CRG), under accession number EGAS00001005034.

### **Datasets, merging, and phasing**

We merged our data with the published genome-wide SNP genotype data of global populations (Supplementary Fig. 1 and Supplementary Table 1) available from the Estonian Biocentre database (<https://evolbio.ut.ee/>). The combined dataset was filtered using PLINK version 1.9 [4] to include only autosomal SNPs with a minor allele frequency of  $>1\%$ , a genotyping success rate of  $>97\%$ , and only individuals with a genotyping success rate of  $>95\%$ . The filtered combined dataset, which included 2139 individuals and 244,688 SNPs, was phased using the SHAPEIT algorithm [5] and used for further analyses. To avoid the effects of markers with a strong linkage disequilibrium, we thinned the marker set by removing SNPs with an  $r^2$  value of  $>0.4$  using a sliding window of 200 SNPs, shifted at intervals of 25 SNPs. The pruned dataset yielded 155,744 SNPs that were used for the relevant population genetics analyses, including Wright's  $F$ -statistic ( $F_{ST}$ ), principal component analysis (PCA), the ADMIXTURE tool for ancestry estimation, and runs of homozygosity (RoH).

### **Population structure analyses: $F_{ST}$ , PCA, ADMIXTURE, and RoH**

To explore the population genetic structure, we initially computed the mean pairwise  $F_{ST}$  differences between all population groups using the Weir and Cockerham method [6] implemented in PLINK version 1.9 [4]. Next, we conducted PCA of the linkage disequilibrium-pruned combined dataset using the smartpca program included with the EIGENSOFT software package version 6.1.4 [7,8]. Further, we ran an unsupervised structure-like analysis using the ADMIXTURE tool (version 1.3.0) [9] on the same dataset 25 times at different time intervals, with  $K$  values ranging from 2 to 12. Notably,  $K = 9$  was the best supported  $K$  value as determined from the lowest cross-validation indexes. RoH was estimated using PLINK version 1.9 [4] with a sliding window of 100 SNPs (1000 kb), allowing for one heterozygous and five missing calls per window.

### **Analyses to test admixture events and relative allele sharing: $f_3$ and $f_4$ statistics**

We computed the  $f_3$  and  $f_4$  statistics using the *qp3Pop* and *qpDstat* programs (with  $f_4$  mode: YES) implemented in the ADMIXTOOLS software package [10]. A dataset containing 244,688 SNPs

and 2139 individuals was used for analyses of the  $f$ -statistics of modern individuals. The dataset of modern genomes was merged with that of ancient specimens, which contained a combined total of 231,418 SNPs and 3697 individuals. To measure the genetic similarity of different Kuwaiti groups (i.e., modern and ancient), we computed the derived allele sharing of the Kuwaiti population using outgroup  $f_3$  in the form of  $f_3(\text{Mbuti}; \text{Pop1}, \text{X})$ , where Pop1 is one of the three assigned groups of the Kuwaiti population, X is a modern or ancient West Eurasian population, and Mbuti is an outgroup (or Papuan to compare drift sharing between the Kuwait-B subgroup and other modern populations). Admixture  $f_3$  was also calculated to infer the plausible admixing sources in the history of the Kuwaiti population determined by negative  $f_3$  value with Z-score  $< -3$  [10–12]. We calculated the  $f_4$  statistic to evaluate the level of gene flow between contemporary populations of Kuwaitis and their regional neighbors and allele sharing between modern Kuwaitis and available published data of ancient individuals from surrounding regions. The  $f_4$  statistic was applied to numerous population combinations in the form of  $f_4(\text{Pop1}, \text{Pop2}, \text{Pop3}, \text{Mbuti})$ , where Pop1 and Pop2 are two Kuwaiti groups to be compared, while Pop3 is a modern or ancient population from a relevant region.

We estimated the amount of Neanderthal ancestry present in the Kuwaiti subgroups using the  $f_4$ -ratio implemented in the ADMIXTOOLS package [10]. We computed the Neanderthal fraction using the  $f_4$ -ratio in the form  $f_4(\text{Altai}, \text{Chimp}, \text{Target}, \text{Dinka}) / f_4(\text{Altai}, \text{Chimp}, \text{Vindija}, \text{Dinka})$  following Petr et al. (2019) [13].

### **Haplotype-based fine-scale analyses: ChromoPainter and fineSTRUCTURE**

We used the phased dataset with 244,688 SNPs and 2139 individuals for haplotype-based analyses. The ChromoPainter tool, designed to identify haplotypes in sequence data, was used to "paint" each individual as a combination of all other sequences [14]. As a first step, we estimated the  $-n$  (recombination scaling constant) and  $-M$  (per site mutation rate) parameters by running the software's EM option on a small subset of populations and five randomly selected chromosomes (3, 7, 10, 17, and 22), as described elsewhere [15]. The estimated values for the two parameters were  $-n = 510.86$  and  $-M = 0.00033$ . Then, we executed the ChromoPainter tool in the "All vs All" mode (using the  $-a$  flag), where all individuals are considered as both donors and recipients.

Next, we analyzed the resulting painted dataset using the fineSTRUCTURE algorithm [14] to identify genetically homogenous clusters. We first ran the software performing 2 million burn-

in iterations and 4 million MCMC iterations thinned every 10,000. This generated an MCMC file (.xml) that we used to build the tree structure using the option --T 1.

The analyzed individuals were initially classified into 233 clusters, which we reduced to increase the interpretability of subsequent analyses. More specifically, we iteratively “climbed the tree,” and the combined branches consisted of less than five clusters if at least one of them was composed of less than five individuals. The obtained tree was further refined by pooling together pairs or triplets of clusters if the pairwise total variation distance (TVD) based on the number of chunks shared among members of a branch was  $>0.035$ . After refinement, 40 clusters remained.

### **Non-negative least square (NNLS)**

Starting from the copying vectors obtained with the ChromoPainter tool, we reconstructed the ancestry profile of each cluster or individual by applying a slight modification of the NNLS function of R software version 3.5.1 (<https://www.r-project.org/>), as described elsewhere [15,16]. Therefore, for each individual belonging to a Kuwait cluster and for each of these clusters, we decomposed their ancestry as a mixture (with proportions summing to 1) of five (North/East Europe, Bedouins1, Yoruba, Druze, and North Africa clusters) and three (only North/East Europe, Bedouins1, and Yoruba) putative ancestral sources.

### **Exploring the variability of Kuwaiti individuals via pairwise TVD analysis**

To obtain a detailed picture of the variation underlying modern-day Kuwaiti population, we determined the pairwise TVD [16,17] among different individuals in specific clusters. TVD indicates the differences in ancestry profiles among individuals, where a high TVD value indicates high heterogeneity. First, we determined the TVD among individuals of the same cluster. Second, focusing only on Kuwaiti individuals, we determined the TVD among Kuwaitis and all the members of the respective clusters. Third, for each cluster, we determined the TVD only among Kuwaiti individuals. The analysis was performed in consideration of the number and length of genomic fragments inherited among individuals.

### **Estimation of admixture dates**

The times of admixture events were investigated using the GLOBETROTTER software [18]. We applied an “individual” approach by analyzing each Kuwaiti individual alone [19]. First, we

estimated the time of the admixture event by applying the prop.ind=1, null.ind=0 approach to the 583 target individuals. Then, we performed 20 bootstrap iterations with the following settings: prop.ind=0, bootstrap.date.ind=1, and num.admixdates.bootstrap=1. For each of the inferred admixture events, we considered only those that were characterized by bootstrap values for the time of an admixture event between 1 and 400.

We also computed a weighted LD statistic estimating the date of admixture using ALDER version 1.03 that model the decay of admixture LD [20] to validate the admixture events calculated by ALDER and GLOBETROTTER are consistent.

## References

1. Alsmadi O, Thareja G, Alkayal F, Rajagopalan R, John SE, Hebbar P, et al. Genetic substructure of Kuwaiti population reveals migration history. *PLoS One*. 2013;8: e74913.
2. Hebbar P, Elkum N, Alkayal F, John SE, Thanaraj TA, Alsmadi O. Genetic risk variants for metabolic traits in Arab populations. *Sci Rep*. 2017;7: 40988.
3. Hebbar P, Nizam R, Melhem M, Alkayal F, Elkum N, John SE, et al. Genome-wide association study identifies novel recessive genetic variants for high TGs in an Arab population. *J Lipid Res*. 2018;59: 1951–1966.
4. Chang CC, Chow CC, Tellier LC, Vattikuti S, Purcell SM, Lee JJ. Second-generation PLINK: rising to the challenge of larger and richer datasets. *Gigascience*. 2015;4: 7.
5. Delaneau O, Marchini J, Zagury J-F. A linear complexity phasing method for thousands of genomes. *Nat Methods*. 2011;9: 179–181.
6. Weir BS, Cockerham CC. ESTIMATING F-STATISTICS FOR THE ANALYSIS OF POPULATION STRUCTURE. *Evolution*. 1984;38: 1358–1370.
7. Patterson N, Price AL, Reich D. Population structure and eigen analysis. *PLoS Genet*. 2006;2: e190.
8. Price AL, Patterson NJ, Plenge RM, Weinblatt ME, Shadick NA, Reich D. Principal components analysis corrects for stratification in genome-wide association studies. *Nat Genet*. 2006;38: 904–909.
9. Alexander DH, Novembre J, Lange K. Fast model-based estimation of ancestry in unrelated individuals. *Genome Res*. 2009;19: 1655–1664.

10. Patterson N, Moorjani P, Luo Y, Mallick S, Rohland N, Zhan Y, et al. Ancient admixture in human history. *Genetics*. 2012;192: 1065–1093.
11. Pathak AK. Identifying admixture and genetic ancestry in human populations via genetic drift pattern. *Polymorphism*. 2020;4: 5–20.
12. Reich D, Thangaraj K, Patterson N, Price AL, Singh L. Reconstructing Indian population history. *Nature*. 2009;461: 489–494.
13. Petr M, Pääbo S, Kelso J, Vernot B. Limits of long-term selection against Neandertal introgression. *Proc Natl Acad Sci U S A*. 2019;116: 1639–1644.
14. Lawson DJ, Hellenthal G, Myers S, Falush D. Inference of population structure using dense haplotype data. *PLoS Genet*. 2012;8: e1002453.
15. Montinaro F, Busby GBJ, Pascali VL, Myers S, Hellenthal G, Capelli C. Unravelling the hidden ancestry of American admixed populations. *Nat Commun*. 2015;6: 6596.
16. Leslie S, Winney B, Hellenthal G, Davison D, Boumertit A, Day T, et al. The fine-scale genetic structure of the British population. *Nature*. 2015;519: 309–314.
17. Busby GBJ, Hellenthal G, Montinaro F, Tofanelli S, Bulayeva K, Rudan I, et al. The Role of Recent Admixture in Forming the Contemporary West Eurasian Genomic Landscape. *Curr Biol*. 2015;25: 2878.
18. Hellenthal G, Busby GBJ, Band G, Wilson JF, Capelli C, Falush D, et al. A genetic atlas of human admixture history. *Science*. 2014;343: 747–751.
19. Ongaro L, Scliar MO, Flores R, Raveane A, Marnetto D, Sarno S, et al. The Genomic Impact of European Colonization of the Americas. *Curr Biol*. 2019;29: 3974–3986.e4.
20. Loh P-R, Lipson M, Patterson N, Moorjani P, Pickrell JK, Reich D, et al. Inferring admixture histories of human populations using linkage disequilibrium. *Genetics*. 2013;193: 1233–1254.



**Supplementary Fig. 1.** (A) Geographical location of the populations included in the study. (B) Sample information, quality control measures and the population genetics analyses performed in the study.

A

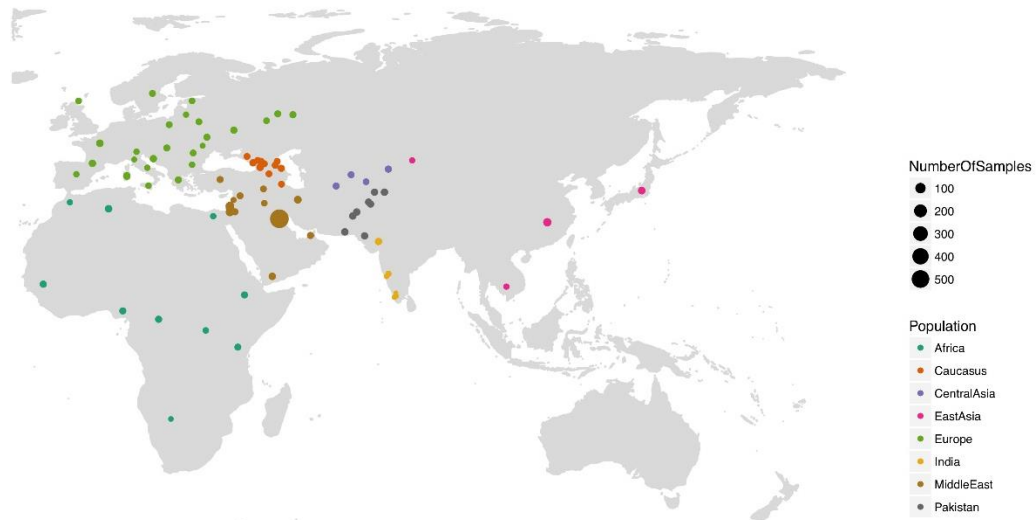

B

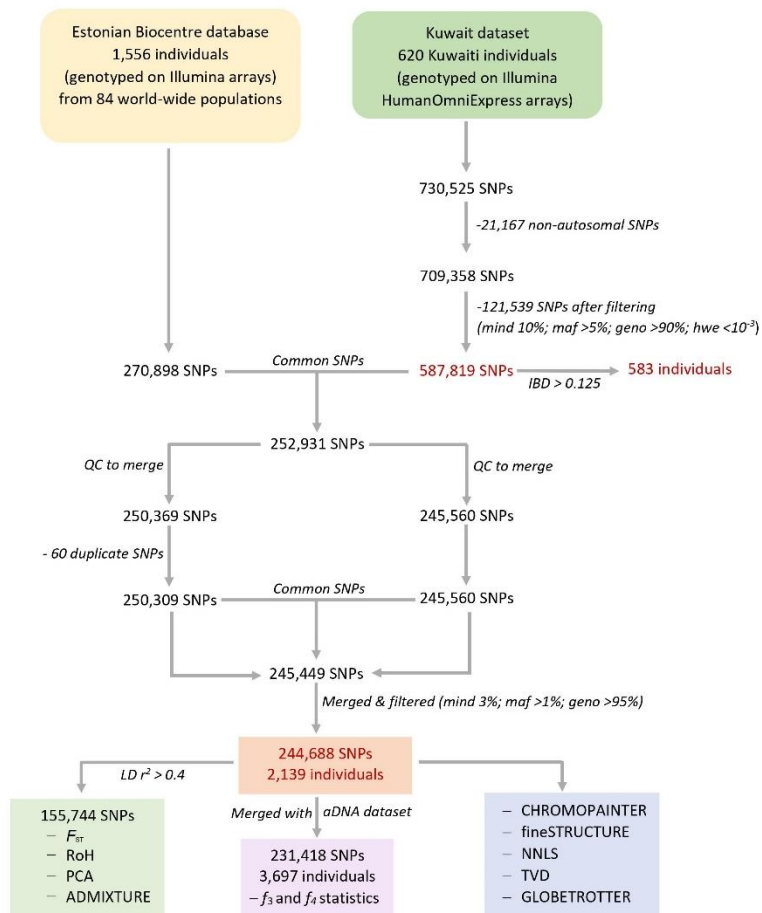

**Supplementary Fig. 2.** The mean pairwise  $F_{ST}$  values showing genetic distance between individual populations.

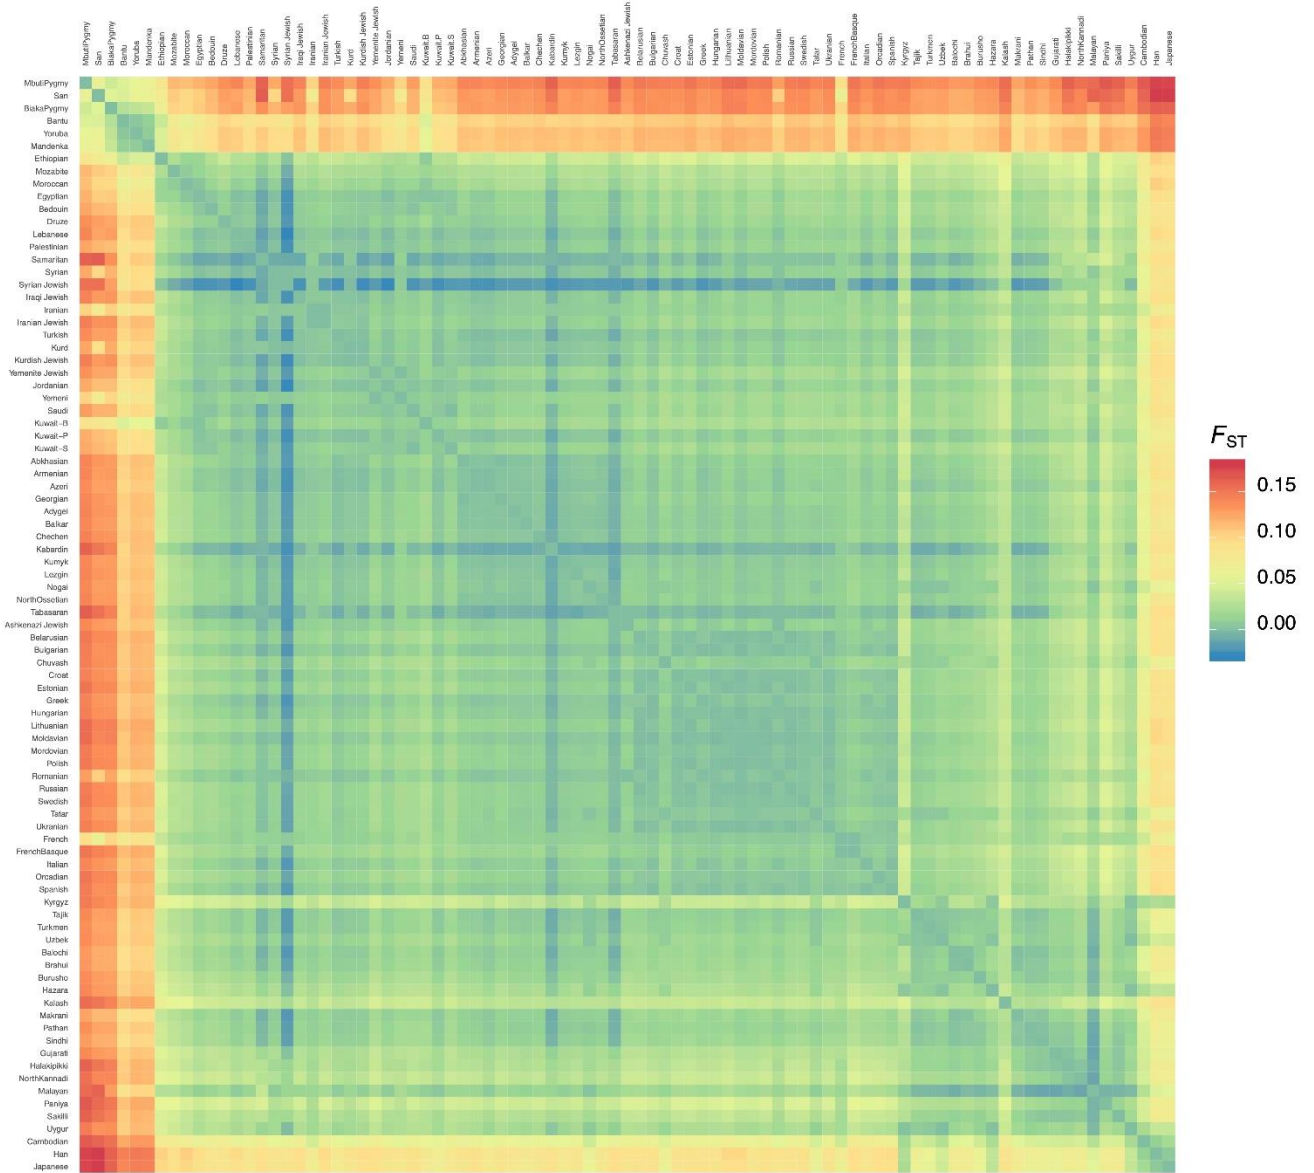

**Supplementary Fig. 3.** Principal Component Analysis plot based on allele frequency representing the first two principal components, PC1 and PC2, accounting for 2.11% and 1.72% of the variation respectively.

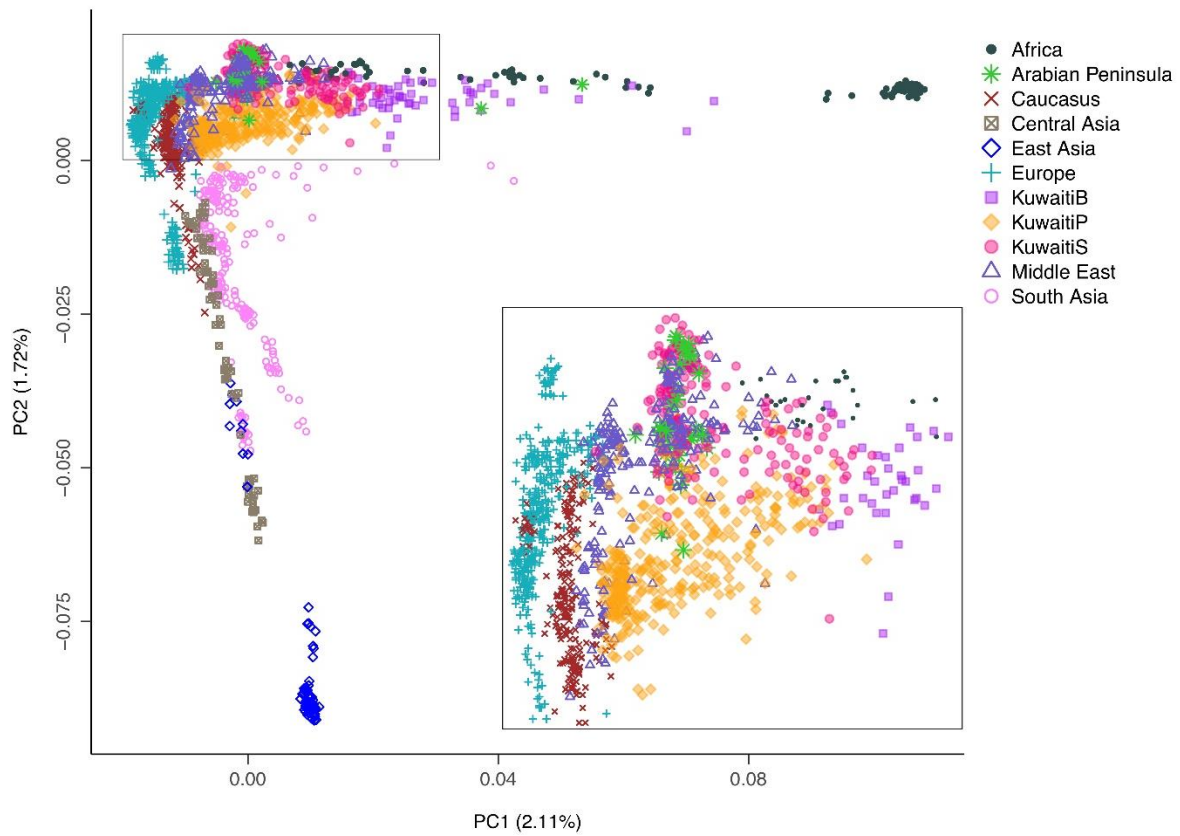

**Supplementary Fig. 4.**  $f_3$  -statistics with Papuans as outgroup in the form  $D(\text{Papuans}; \text{Pop1}, X)$  where Pop1 represents a Kuwaiti subgroup and X is a present-day population, comparing the genetic affinity of the Kuwait population subgroups to other global modern populations.

The group color code for the populations on the y-axis: brown-Africa; blue-Arabian Peninsula; blue violet-Middle East; deep sky blue-Europe; coral-Caucasus; chartreuse-Central Asia; dark orange-South Asia.

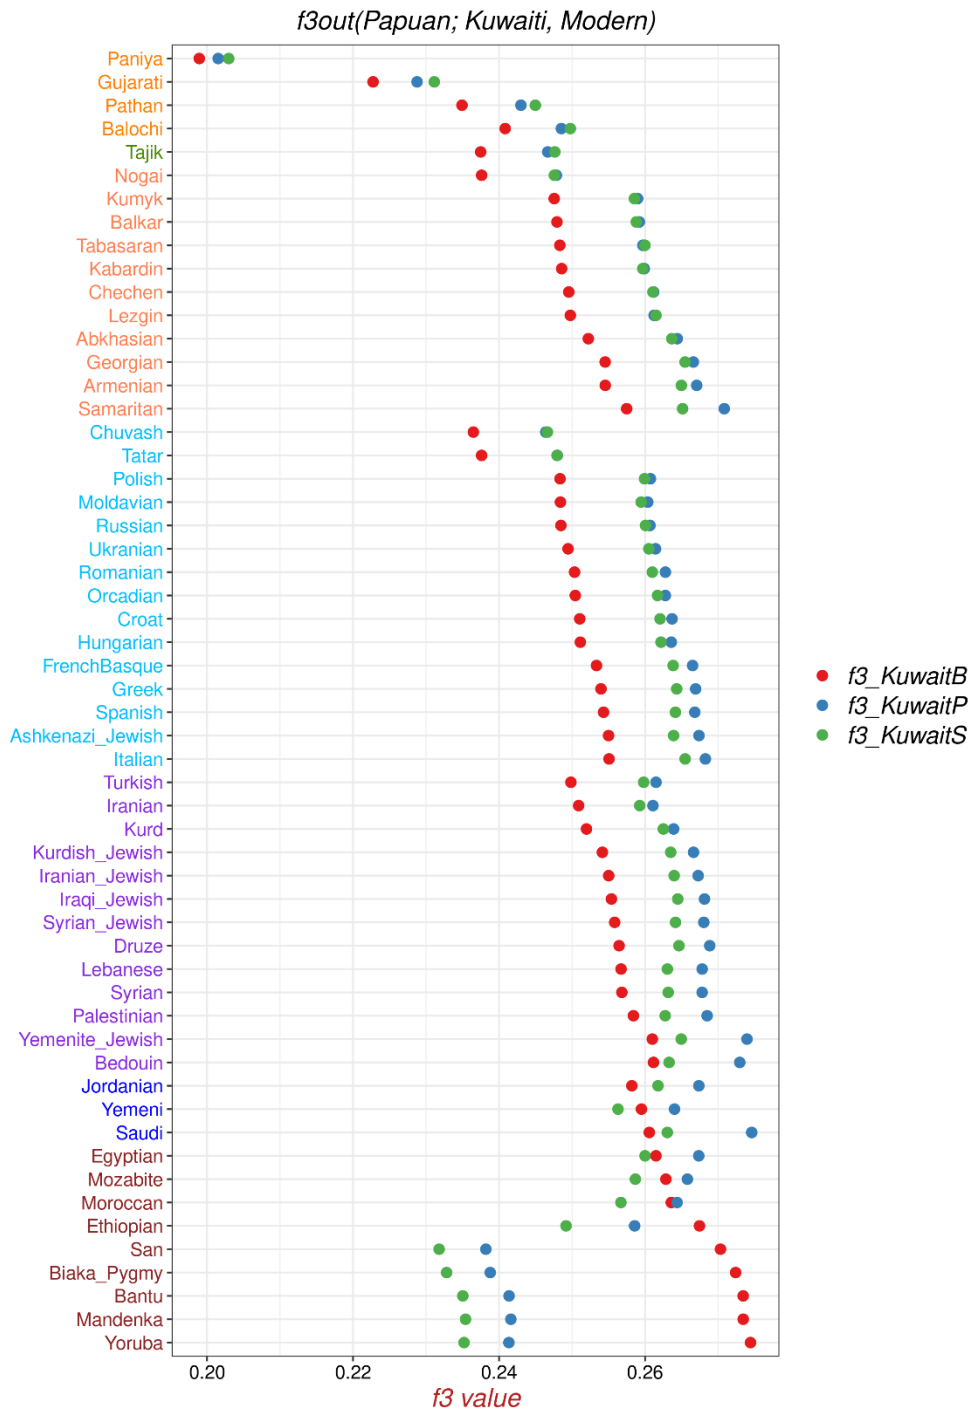

**Supplementary Fig. 5.** Intra cluster Total Variation Distance (TVD) for number and length of genomic fragments among the 40 clusters inferred by fineSTRUCTURE. (A) TVD estimated on number of fragments. (B) TVD estimated on length of fragments.

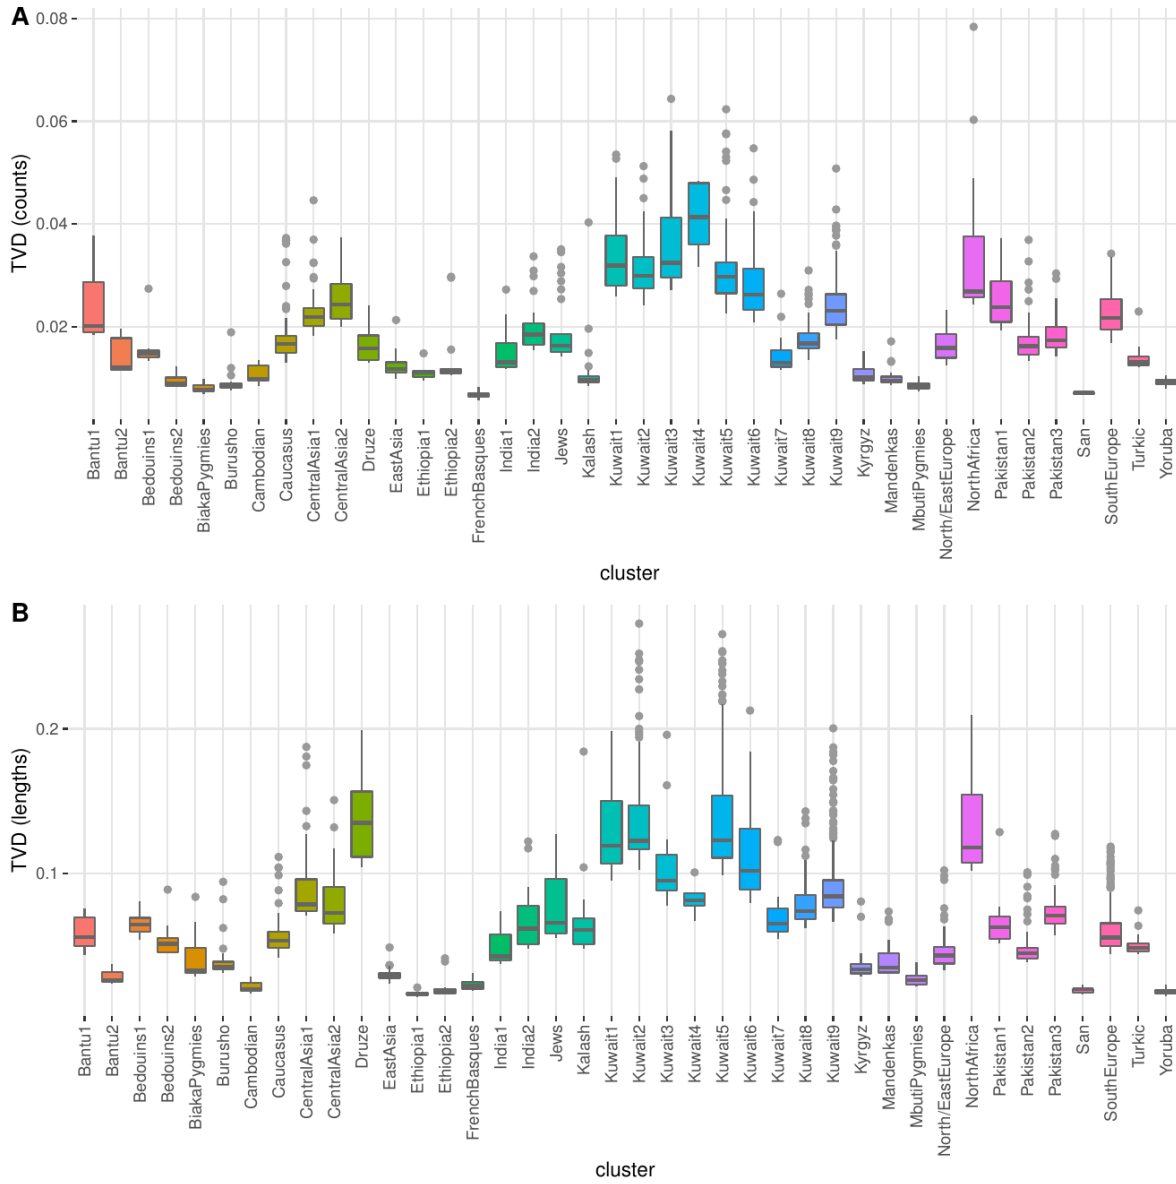

**Supplementary Fig. 6.** Intra cluster Total Variation Distance for number and length of genomic fragments among Kuwaiti individuals from the same cluster. Lower boxplots refer to TVD estimated on number of fragments, while upper boxplots refer to TVD estimated on length of fragments.

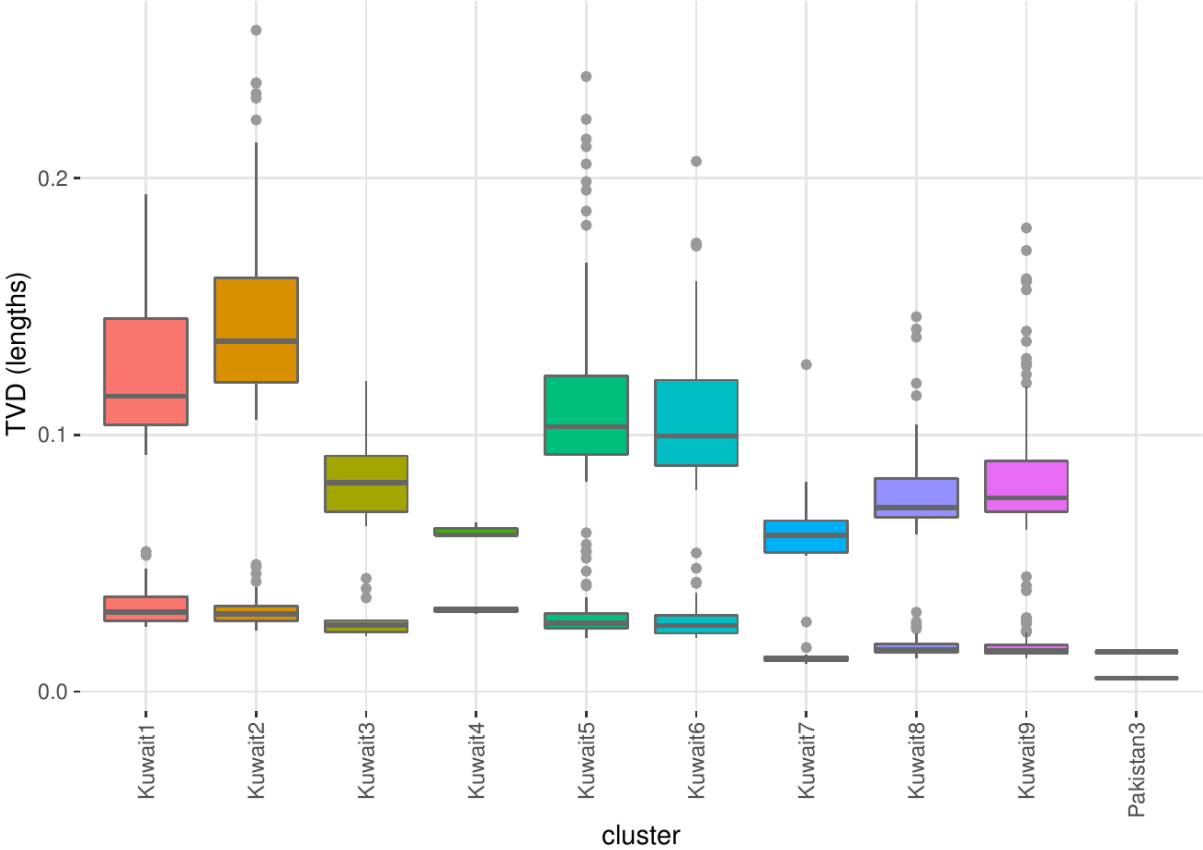

**Supplementary Fig. 7.** Ancestry proportions of the main eight Kuwait clusters as inferred by NNLS analysis using North/East Europe, Bedouins, Yoruba, Druze and North Africa clusters as putative sources.

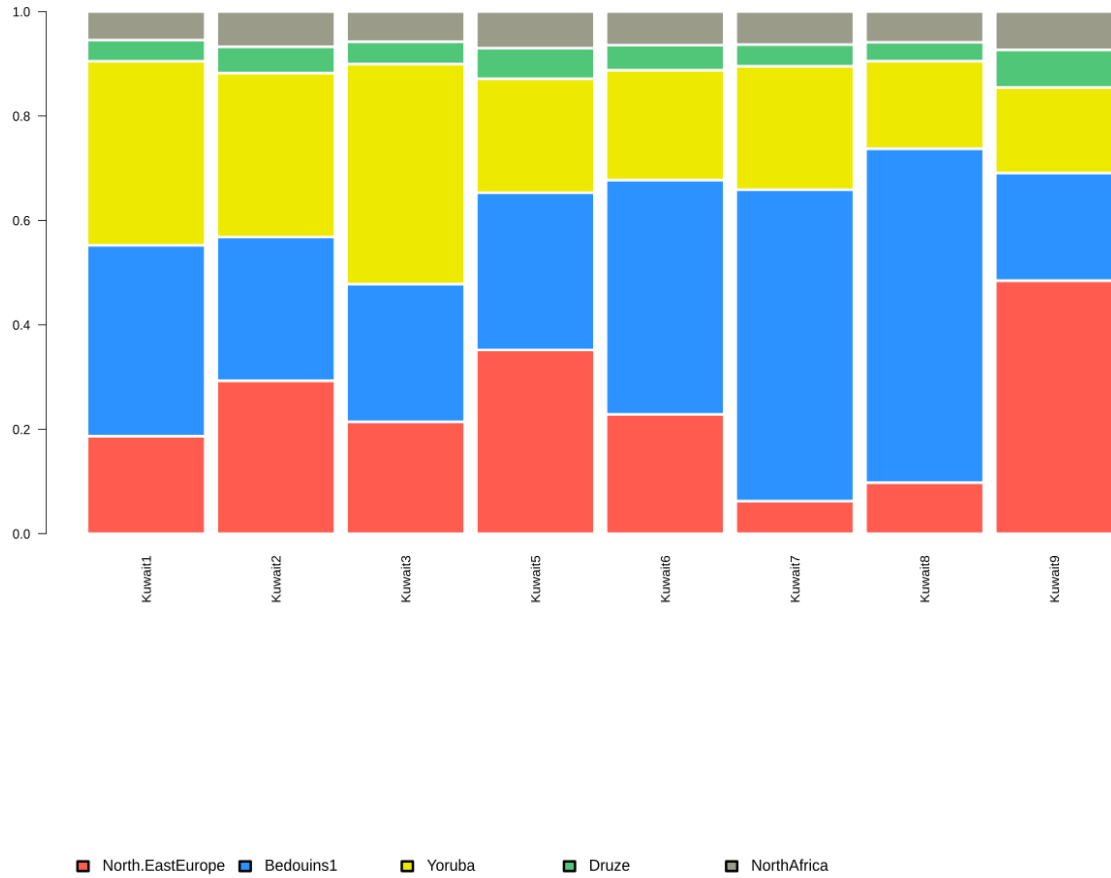

**Supplementary Fig. 8.** Inferred admixture sources by GLOBETROTTER population based analysis. (A) The x and y axes show the minor and major sources, respectively, as inferred by GLOBETROTTER. (B) Type of admixture.

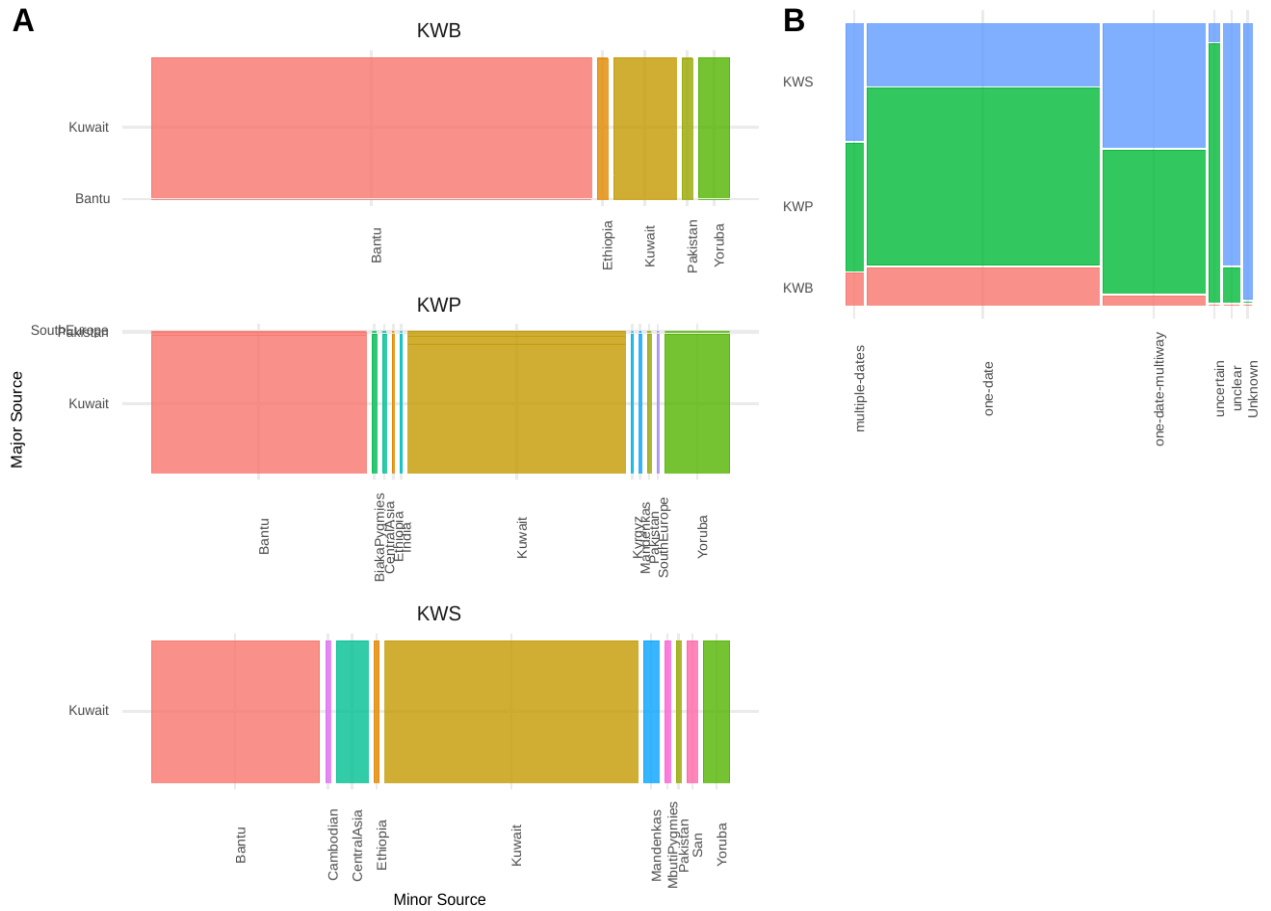



**Supplementary Table 1.** Details of the populations included in the study.

| <b>Region</b>      | <b>Population</b> | <b>No. of individuals</b> | <b>Publication</b>                           |
|--------------------|-------------------|---------------------------|----------------------------------------------|
| Middle East        | Bedouin           | 45                        | Li et al 2008                                |
| Middle East        | Druze             | 45                        | Li et al 2008; Behar et al 2013              |
| Middle East        | Lebanese          | 8                         | Behar et al 2010                             |
| Middle East        | Palestinian       | 52                        | Li et al 2008; Behar et al 2013              |
| Middle East        | Samaritan         | 2                         | Behar et al 2010                             |
| Middle East        | Syrian            | 16                        | Behar et al 2010                             |
| Middle East        | Turkish           | 19                        | Behar et al 2010                             |
| Middle East        | Iranian           | 19                        | Behar et al 2010                             |
| Middle East        | Kurd              | 6                         | Yunusbayev et al 2012                        |
| Middle East        | Iranian Jewish    | 12                        | Behar et al 2010; Behar et al 2013           |
| Middle East        | Iraqi Jewish      | 13                        | Behar et al 2010; Behar et al 2013           |
| Middle East        | Kurdish Jewish    | 9                         | Behar et al. 2013                            |
| Middle East        | Syrian Jewish     | 2                         | Behar et al. 2013                            |
| Middle East        | Yemenite Jewish   | 18                        | Behar et al 2010; Behar et al 2013           |
| Arabian Peninsula  | Kuwait            | 583                       | Present Study                                |
| Arabian Peninsula  | Saudi             | 20                        | Behar et al 2010                             |
| Arabian Peninsula  | Yemeni            | 8                         | Behar et al 2010                             |
| Arabian Peninsula  | Jordanian         | 20                        | Behar et al 2010                             |
| Sub-Saharan Africa | Bantu             | 18                        | Li et al 2008                                |
| Central Africa     | Biaka Pygmy       | 22                        | Li et al 2008                                |
| North Africa       | Egyptian          | 12                        | Behar et al 2010                             |
| North Africa       | Ethiopian         | 19                        | Behar et al 2010                             |
| West Africa        | Mandenka          | 22                        | Li et al 2008                                |
| Central Africa     | Mbuti Pygmy       | 13                        | Li et al 2008                                |
| North Africa       | Moroccan          | 10                        | Behar et al 2010                             |
| North Africa       | Mozabite          | 27                        | Li et al 2008                                |
| South Africa       | San               | 5                         | Li et al 2008                                |
| West Africa        | Yoruba            | 21                        | Li et al 2008                                |
| South Caucasus     | Abkhasian         | 23                        | Yunusbayev et al 2012; Behar et al 2013      |
| South Caucasus     | Armenian          | 16                        | Yunusbayev et al 2012                        |
| South Caucasus     | Azeri             | 16                        | Yunusbayev et al 2015                        |
| South Caucasus     | Georgian          | 30                        | Behar et al 2010; Behar et al 2013           |
| North Caucasus     | Adygei            | 17                        | Li et al 2008                                |
| North Caucasus     | Balkar            | 22                        | Yunusbayev et al 2015; Yunusbayev et al 2012 |
| North Caucasus     | Chechen           | 20                        | Yunusbayev et al 2012                        |
| North Caucasus     | Kabardin          | 3                         | Yunusbayev et al 2015                        |
| North Caucasus     | Kumyk             | 17                        | Yunusbayev et al 2015; Yunusbayev et al 2012 |
| North Caucasus     | Lezgin            | 21                        | Behar et al 2010; Behar et al 2013           |
| North Caucasus     | Nogai             | 16                        | Yunusbayev et al 2012                        |
| North Caucasus     | North Ossetian    | 18                        | Yunusbayev et al 2012; Behar et al 2013      |
| North Caucasus     | Tabasaran         | 3                         | Behar et al. 2013                            |
| Central Asia       | Kyrgyz            | 20                        | Yunusbayev et al 2015                        |
| Central Asia       | Tajik             | 15                        | Yunusbayev et al 2012                        |
| Central Asia       | Turkmen           | 18                        | Yunusbayev et al 2012; Yunusbayev et al 2015 |
| Central Asia       | Uzbek             | 19                        | Behar et al 2010                             |
| East Asia          | Cambodian         | 10                        | Li et al 2008                                |

| <b>Region</b>         | <b>Population</b> | <b>No. of individuals</b> | <b>Publication</b>                      |
|-----------------------|-------------------|---------------------------|-----------------------------------------|
| East Asia             | Han               | 44                        | Li et al 2008                           |
| East Asia             | Japanese          | 28                        | Li et al 2008                           |
| East Asia             | Uygur             | 10                        | Li et al 2008                           |
| Western Europe        | French            | 28                        | Li et al 2008                           |
| Western Europe        | French Basque     | 24                        | Li et al 2008                           |
| Western Europe        | Italian           | 71                        | Li et al 2008; Behar et al 2013         |
| Western Europe        | Orcadian          | 15                        | Li et al 2008                           |
| Western Europe        | Spanish           | 12                        | Behar et al 2010                        |
| Eastern Europe        | Belarusian        | 17                        | Behar et al 2010; Behar et al 2013      |
| Eastern Europe        | Bulgarian         | 13                        | Yunusbayev et al 2012                   |
| Eastern Europe        | Chuvash           | 19                        | Behar et al 2010; Yunusbayev et al 2015 |
| Eastern Europe        | Croat             | 24                        | Behar et al. 2013                       |
| Eastern Europe        | Estonian          | 15                        | Raghavan et al. 2014                    |
| Eastern Europe        | Greek             | 20                        | Behar et al. 2013                       |
| Eastern Europe        | Hungarian         | 19                        | Behar et al 2010                        |
| Eastern Europe        | Lithuanian        | 10                        | Behar et al 2010                        |
| Eastern Europe        | Moldavian         | 7                         | Behar et al. 2013                       |
| Eastern Europe        | Mordovian         | 15                        | Yunusbayev et al 2012                   |
| Eastern Europe        | Polish            | 17                        | Behar et al. 2013                       |
| Eastern Europe        | Romanian          | 16                        | Behar et al 2010                        |
| Eastern Europe        | Russian           | 23                        | Yunusbayev et al 2015                   |
| Eastern Europe        | Swedish           | 18                        | Behar et al. 2013                       |
| Eastern Europe        | Tatar             | 20                        | Yunusbayev et al 2015                   |
| Eastern Europe        | Ukranian          | 20                        | Yunusbayev et al 2012                   |
| Eastern Europe        | Ashkenazi Jewish  | 29                        | Behar et al 2010; Behar et al 2013      |
| South Asia (Pakistan) | Balochi           | 24                        | Li et al 2008                           |
| South Asia (Pakistan) | Brahui            | 25                        | Li et al 2008                           |
| South Asia (Pakistan) | Burusho           | 25                        | Li et al 2008                           |
| South Asia (Pakistan) | Hazara            | 22                        | Li et al 2008                           |
| South Asia (Pakistan) | Kalash            | 23                        | Li et al 2008                           |
| South Asia (Pakistan) | Makrani           | 25                        | Li et al 2008                           |
| South Asia (Pakistan) | Pathan            | 22                        | Li et al 2008                           |
| South Asia (Pakistan) | Sindhi            | 24                        | Li et al 2008                           |
| South Asia (India)    | Gujarati          | 23                        | Hapmap3                                 |
| South Asia (India)    | Halakipikki       | 4                         | Metspalu et al 2011                     |
| South Asia (India)    | Malayan           | 2                         | Behar et al 2010                        |
| South Asia (India)    | North Kannadi     | 8                         | Behar et al 2010                        |
| South Asia (India)    | Paniya            | 4                         | Behar et al 2010                        |
| South Asia (India)    | Sakilli           | 4                         | Behar et al 2010                        |

## References

- Behar DM, Metspalu M, Baran Y, Kopelman NM, Yunusbayev B, Gladstein A, et al. No evidence from genome-wide data of a Khazar origin for the Ashkenazi Jews. *Hum Biol.* 2013;85: 859–900.
- Behar DM, Yunusbayev B, Metspalu M, Metspalu E, Rosset S, Parik J, et al. The genome-wide structure of the Jewish people. *Nature.* 2010;466: 238–242.
- HapMap 3 Consortium I. Integrating common and rare genetic variation in diverse human populations. *Nature.* 2010. Available: <https://www.ncbi.nlm.nih.gov/pmc/articles/pmc3173859/>
- Li JZ, Absher DM, Tang H, Southwick AM, Casto AM, Ramachandran S, et al. Worldwide human relationships inferred from genome-wide patterns of variation. *Science.* 2008;319: 1100–1104.
- Metspalu M, Romero IG, Yunusbayev B, Chaubey G, Mallick CB, Hudjashov G, et al. Shared and unique components of human population structure and genome-wide signals of positive selection in South Asia. *Am J Hum Genet.* 2011;89: 731–744.
- Raghavan M, Skoglund P, Graf KE, Metspalu M, Albrechtsen A, Moltke I, et al. Upper Palaeolithic Siberian genome reveals dual ancestry of Native Americans. *Nature.* 2014;505: 87–91.
- Yunusbayev B, Metspalu M, Järve M, Kutuev I, Rootsi S, Metspalu E, et al. The Caucasus as an asymmetric semipermeable barrier to ancient human migrations. *Mol Biol Evol.* 2012;29: 359–365.
- Yunusbayev B, Metspalu M, Metspalu E, Valeev A, Litvinov S, Valiev R, et al. The genetic legacy of the expansion of Turkic-speaking nomads across Eurasia. *PLoS Genet.* 2015;11: e1005068.

**Supplementary Table 2.**  $f_4$ -statistics comparing the genetic affinity of the Kuwait population subgroups to other modern populations.

| Pop1     | Pop2     | Pop3        | Pop4          | D val    | std err  | Z val  |
|----------|----------|-------------|---------------|----------|----------|--------|
| Kuwait-P | Kuwait-S | Gujaratis   | Mbuti_Pygmies | 0.002097 | 0.000066 | 31.825 |
| Kuwait-P | Kuwait-S | Gujjar      | Mbuti_Pygmies | 0.002043 | 0.000068 | 29.994 |
| Kuwait-P | Kuwait-S | Kshatriya   | Mbuti_Pygmies | 0.002105 | 0.00007  | 29.985 |
| Kuwait-P | Kuwait-S | Pathan      | Mbuti_Pygmies | 0.002001 | 0.000067 | 29.835 |
| Kuwait-P | Kuwait-S | Ror         | Mbuti_Pygmies | 0.002052 | 0.000069 | 29.751 |
| Kuwait-P | Kuwait-S | Chamar      | Mbuti_Pygmies | 0.002001 | 0.00007  | 28.733 |
| Kuwait-P | Kuwait-S | Gond        | Mbuti_Pygmies | 0.001865 | 0.000067 | 27.647 |
| Kuwait-P | Kuwait-S | Pamiris     | Mbuti_Pygmies | 0.001887 | 0.000068 | 27.564 |
| Kuwait-P | Kuwait-S | Brahmins_UP | Mbuti_Pygmies | 0.001982 | 0.000072 | 27.543 |
| Kuwait-P | Kuwait-S | Irula       | Mbuti_Pygmies | 0.001898 | 0.00007  | 27.161 |
| Kuwait-P | Kuwait-S | Balochi     | Mbuti_Pygmies | 0.001812 | 0.000067 | 27.065 |
| Kuwait-P | Kuwait-S | Paniya      | Mbuti_Pygmies | 0.001864 | 0.000071 | 26.151 |
| Kuwait-P | Kuwait-S | Ho          | Mbuti_Pygmies | 0.001778 | 0.000069 | 25.841 |
| Kuwait-P | Kuwait-S | Chukchis    | Mbuti_Pygmies | 0.001838 | 0.000073 | 25.238 |
| Kuwait-P | Kuwait-S | Tajiks      | Mbuti_Pygmies | 0.001747 | 0.000071 | 24.66  |
| Kuwait-P | Kuwait-S | Karitiana   | Mbuti_Pygmies | 0.002152 | 0.000087 | 24.633 |
| Kuwait-P | Kuwait-S | Pashtun     | Mbuti_Pygmies | 0.001816 | 0.000074 | 24.599 |
| Kuwait-P | Kuwait-S | Kusundas    | Mbuti_Pygmies | 0.001787 | 0.000073 | 24.317 |
| Kuwait-P | Kuwait-S | Kyrgyzians  | Mbuti_Pygmies | 0.001679 | 0.000071 | 23.675 |
| Kuwait-P | Kuwait-S | Uygurs      | Mbuti_Pygmies | 0.001716 | 0.000073 | 23.505 |
| Kuwait-P | Kuwait-S | Lezgins     | Mbuti_Pygmies | 0.001566 | 0.00007  | 22.221 |
| Kuwait-P | Kuwait-S | Japanese    | Mbuti_Pygmies | 0.001652 | 0.000075 | 21.894 |
| Kuwait-P | Kuwait-S | Han         | Mbuti_Pygmies | 0.001646 | 0.000075 | 21.887 |
| Kuwait-P | Kuwait-S | Chuvash     | Mbuti_Pygmies | 0.001561 | 0.000072 | 21.551 |
| Kuwait-P | Kuwait-S | Cambodians  | Mbuti_Pygmies | 0.001599 | 0.000075 | 21.312 |
| Kuwait-P | Kuwait-S | Turkmens    | Mbuti_Pygmies | 0.001458 | 0.000069 | 21.236 |
| Kuwait-P | Kuwait-S | Tatars      | Mbuti_Pygmies | 0.001496 | 0.000072 | 20.877 |
| Kuwait-P | Kuwait-S | Chechens    | Mbuti_Pygmies | 0.001478 | 0.000071 | 20.7   |
| Kuwait-P | Kuwait-S | Nogais      | Mbuti_Pygmies | 0.001434 | 0.000072 | 20.049 |
| Kuwait-P | Kuwait-S | Kumyks      | Mbuti_Pygmies | 0.001391 | 0.00007  | 19.972 |
| Kuwait-P | Kuwait-S | Parsis      | Mbuti_Pygmies | 0.001394 | 0.00007  | 19.863 |
| Kuwait-P | Kuwait-S | Balkars     | Mbuti_Pygmies | 0.001398 | 0.00007  | 19.848 |
| Kuwait-P | Kuwait-S | Onge        | Mbuti_Pygmies | 0.001538 | 0.000081 | 19.083 |
| Kuwait-P | Kuwait-S | Tabasaran   | Mbuti_Pygmies | 0.001576 | 0.000084 | 18.711 |
| Kuwait-P | Kuwait-S | Abkhasians  | Mbuti_Pygmies | 0.001314 | 0.00007  | 18.684 |
| Kuwait-P | Kuwait-S | Kabardins   | Mbuti_Pygmies | 0.00145  | 0.00008  | 18.123 |
| Kuwait-P | Kuwait-S | Ukrainians  | Mbuti_Pygmies | 0.001271 | 0.000073 | 17.396 |
| Kuwait-P | Kuwait-S | Polish      | Mbuti_Pygmies | 0.001297 | 0.000075 | 17.265 |
| Kuwait-P | Kuwait-S | Russians    | Mbuti_Pygmies | 0.001347 | 0.000078 | 17.201 |
| Kuwait-P | Kuwait-S | Georgians   | Mbuti_Pygmies | 0.001216 | 0.000073 | 16.596 |

| Pop1            | Pop2            | Pop3                | Pop4                 | D val            | std err         | Z val          |
|-----------------|-----------------|---------------------|----------------------|------------------|-----------------|----------------|
| Kuwait-P        | Kuwait-S        | Moldavians          | Mbuti_Pygmies        | 0.001275         | 0.000077        | 16.582         |
| Kuwait-P        | Kuwait-S        | Azeris              | Mbuti_Pygmies        | 0.001153         | 0.00007         | 16.557         |
| Kuwait-P        | Kuwait-S        | Orcadians           | Mbuti_Pygmies        | 0.001231         | 0.000074        | 16.556         |
| Kuwait-P        | Kuwait-S        | Hungarians          | Mbuti_Pygmies        | 0.001148         | 0.000074        | 15.494         |
| Kuwait-P        | Kuwait-S        | Turks               | Mbuti_Pygmies        | 0.001076         | 0.00007         | 15.449         |
| Kuwait-P        | Kuwait-S        | Kurds               | Mbuti_Pygmies        | 0.001146         | 0.000075        | 15.254         |
| Kuwait-P        | Kuwait-S        | Iranians            | Mbuti_Pygmies        | 0.001045         | 0.000069        | 15.202         |
| Kuwait-P        | Kuwait-S        | Croatians           | Mbuti_Pygmies        | 0.001088         | 0.000073        | 14.828         |
| Kuwait-P        | Kuwait-S        | Romanians           | Mbuti_Pygmies        | 0.00105          | 0.000073        | 14.387         |
| Kuwait-P        | Kuwait-S        | Romanians           | Mbuti_Pygmies        | 0.00105          | 0.000073        | 14.387         |
| Kuwait-P        | Kuwait-S        | Armenians           | Mbuti_Pygmies        | 0.000974         | 0.00007         | 14.008         |
| Kuwait-P        | Kuwait-S        | Greeks              | Mbuti_Pygmies        | 0.000848         | 0.000073        | 11.621         |
| Kuwait-P        | Kuwait-S        | FrenchBasques       | Mbuti_Pygmies        | 0.000831         | 0.000074        | 11.187         |
| Kuwait-P        | Kuwait-S        | Spaniards           | Mbuti_Pygmies        | 0.000832         | 0.000075        | 11.083         |
| Kuwait-P        | Kuwait-S        | Tuscans             | Mbuti_Pygmies        | 0.00081          | 0.000075        | 10.808         |
| Kuwait-P        | Kuwait-S        | North_Italians      | Mbuti_Pygmies        | 0.000803         | 0.000077        | 10.458         |
| Kuwait-P        | Kuwait-S        | KurdishJews         | Mbuti_Pygmies        | 0.000714         | 0.000072        | 9.893          |
| Kuwait-P        | Kuwait-S        | IranianJewish       | Mbuti_Pygmies        | 0.000674         | 0.00007         | 9.66           |
| Kuwait-P        | Kuwait-S        | AshkenaziJewish     | Mbuti_Pygmies        | 0.000625         | 0.00007         | 8.92           |
| Kuwait-P        | Kuwait-S        | IraqiJewish         | Mbuti_Pygmies        | 0.00058          | 0.000071        | 8.228          |
| Kuwait-P        | Kuwait-S        | Druze               | Mbuti_Pygmies        | 0.00044          | 0.000068        | 6.467          |
| Kuwait-P        | Kuwait-S        | SyrianJews          | Mbuti_Pygmies        | 0.000526         | 0.000091        | 5.752          |
| Kuwait-P        | Kuwait-S        | Sardinians          | Mbuti_Pygmies        | 0.000402         | 0.000073        | 5.5            |
| Kuwait-P        | Kuwait-S        | Syrians             | Mbuti_Pygmies        | 0.000331         | 0.00007         | 4.715          |
| Kuwait-P        | Kuwait-S        | Lebanese            | Mbuti_Pygmies        | 0.000302         | 0.000072        | 4.185          |
| Kuwait-P        | Kuwait-S        | Jordanians          | Mbuti_Pygmies        | 0.000093         | 0.000064        | 1.463          |
| Kuwait-P        | Kuwait-S        | Palestinians        | Mbuti_Pygmies        | 0.000054         | 0.000064        | 0.843          |
| Kuwait-P        | Kuwait-S        | Samartians          | Mbuti_Pygmies        | 0.000064         | 0.000091        | 0.708          |
| <b>Kuwait-P</b> | <b>Kuwait-S</b> | <b>Mandenka</b>     | <b>Mbuti_Pygmies</b> | <b>-0.00006</b>  | <b>0.000035</b> | <b>-1.716</b>  |
| <b>Kuwait-P</b> | <b>Kuwait-S</b> | <b>Mozabites</b>    | <b>Mbuti_Pygmies</b> | <b>-0.000295</b> | <b>0.000061</b> | <b>-4.825</b>  |
| <b>Kuwait-P</b> | <b>Kuwait-S</b> | <b>Egyptians</b>    | <b>Mbuti_Pygmies</b> | <b>-0.000351</b> | <b>0.000064</b> | <b>-5.505</b>  |
| <b>Kuwait-P</b> | <b>Kuwait-S</b> | <b>Yemenese</b>     | <b>Mbuti_Pygmies</b> | <b>-0.000448</b> | <b>0.000063</b> | <b>-7.12</b>   |
| <b>Kuwait-P</b> | <b>Kuwait-S</b> | <b>Moroccans</b>    | <b>Mbuti_Pygmies</b> | <b>-0.000436</b> | <b>0.000061</b> | <b>-7.131</b>  |
| <b>Kuwait-P</b> | <b>Kuwait-S</b> | <b>Kuwait-B</b>     | <b>Mbuti_Pygmies</b> | <b>-0.000412</b> | <b>0.000051</b> | <b>-8.135</b>  |
| <b>Kuwait-P</b> | <b>Kuwait-S</b> | <b>YemeniteJews</b> | <b>Mbuti_Pygmies</b> | <b>-0.000767</b> | <b>0.000068</b> | <b>-11.259</b> |
| <b>Kuwait-P</b> | <b>Kuwait-S</b> | <b>Bedouins</b>     | <b>Mbuti_Pygmies</b> | <b>-0.000936</b> | <b>0.000065</b> | <b>-14.426</b> |
| <b>Kuwait-P</b> | <b>Kuwait-S</b> | <b>Ethiopians</b>   | <b>Mbuti_Pygmies</b> | <b>-0.000865</b> | <b>0.000047</b> | <b>-18.392</b> |
| <b>Kuwait-P</b> | <b>Kuwait-S</b> | <b>Saudis</b>       | <b>Mbuti_Pygmies</b> | <b>-0.001409</b> | <b>0.000067</b> | <b>-21.098</b> |
| Kuwait-B        | Kuwait-S        | Mandenka            | Mbuti_Pygmies        | -0.000501        | 0.000055        | -9.063         |
| Kuwait-B        | Kuwait-S        | Onge                | Mbuti_Pygmies        | -0.008888        | 0.000134        | -66.54         |
| Kuwait-B        | Kuwait-S        | Karitiana           | Mbuti_Pygmies        | -0.009863        | 0.000145        | -67.986        |
| Kuwait-B        | Kuwait-S        | Japanese            | Mbuti_Pygmies        | -0.00932         | 0.000136        | -68.456        |
| Kuwait-B        | Kuwait-S        | Cambodians          | Mbuti_Pygmies        | -0.009241        | 0.000132        | -70.22         |

| Pop1     | Pop2     | Pop3        | Pop4         | D val     | std err  | Z val   |
|----------|----------|-------------|--------------|-----------|----------|---------|
| Kuwait-B | Kuwait-S | Han         | Mbuti_Pygmys | -0.009316 | 0.000132 | -70.68  |
| Kuwait-B | Kuwait-S | Kusundas    | Mbuti_Pygmys | -0.009414 | 0.000132 | -71.079 |
| Kuwait-B | Kuwait-S | Paniya      | Mbuti_Pygmys | -0.009172 | 0.000127 | -72.037 |
| Kuwait-B | Kuwait-S | Ethiopians  | Mbuti_Pygmys | -0.006282 | 0.000087 | -72.054 |
| Kuwait-B | Kuwait-S | Irula       | Mbuti_Pygmys | -0.00942  | 0.000128 | -73.339 |
| Kuwait-B | Kuwait-S | Ho          | Mbuti_Pygmys | -0.00919  | 0.000125 | -73.757 |
| Kuwait-B | Kuwait-S | Gond        | Mbuti_Pygmys | -0.009306 | 0.000125 | -74.349 |
| Kuwait-B | Kuwait-S | Chamar      | Mbuti_Pygmys | -0.009652 | 0.000129 | -74.883 |
| Kuwait-B | Kuwait-S | Chukchis    | Mbuti_Pygmys | -0.009999 | 0.000133 | -75.133 |
| Kuwait-B | Kuwait-S | Kyrgyzians  | Mbuti_Pygmys | -0.010047 | 0.000132 | -76.383 |
| Kuwait-B | Kuwait-S | Uygurs      | Mbuti_Pygmys | -0.010231 | 0.000133 | -76.971 |
| Kuwait-B | Kuwait-S | Kshatriya   | Mbuti_Pygmys | -0.010103 | 0.000131 | -76.977 |
| Kuwait-B | Kuwait-S | SyrianJews  | Mbuti_Pygmys | -0.011594 | 0.00015  | -77.081 |
| Kuwait-B | Kuwait-S | Samartians  | Mbuti_Pygmys | -0.011887 | 0.000152 | -78.248 |
| Kuwait-B | Kuwait-S | Moroccans   | Mbuti_Pygmys | -0.008719 | 0.000111 | -78.878 |
| Kuwait-B | Kuwait-S | Brahmins_UP | Mbuti_Pygmys | -0.010208 | 0.000129 | -79.085 |
| Kuwait-B | Kuwait-S | Gujjar      | Mbuti_Pygmys | -0.010316 | 0.00013  | -79.283 |
| Kuwait-B | Kuwait-S | Tabasaran   | Mbuti_Pygmys | -0.011385 | 0.000143 | -79.394 |
| Kuwait-B | Kuwait-S | Yemenese    | Mbuti_Pygmys | -0.00966  | 0.000121 | -79.567 |
| Kuwait-B | Kuwait-S | Kabardins   | Mbuti_Pygmys | -0.011369 | 0.000142 | -80.001 |
| Kuwait-B | Kuwait-S | Gujaratis   | Mbuti_Pygmys | -0.010037 | 0.000125 | -80.145 |
| Kuwait-B | Kuwait-S | Pashtun     | Mbuti_Pygmys | -0.010743 | 0.000133 | -80.662 |
| Kuwait-B | Kuwait-S | Mozabites   | Mbuti_Pygmys | -0.009262 | 0.000113 | -81.633 |
| Kuwait-B | Kuwait-S | Ror         | Mbuti_Pygmys | -0.010548 | 0.000128 | -82.26  |
| Kuwait-B | Kuwait-S | Balochi     | Mbuti_Pygmys | -0.010457 | 0.000127 | -82.485 |
| Kuwait-B | Kuwait-S | Chuvash     | Mbuti_Pygmys | -0.011017 | 0.000133 | -82.681 |
| Kuwait-B | Kuwait-S | Tajiks      | Mbuti_Pygmys | -0.010834 | 0.000131 | -82.716 |
| Kuwait-B | Kuwait-S | Nogais      | Mbuti_Pygmys | -0.011097 | 0.000134 | -82.963 |
| Kuwait-B | Kuwait-S | Moldavians  | Mbuti_Pygmys | -0.011531 | 0.000139 | -83.083 |
| Kuwait-B | Kuwait-S | Pathan      | Mbuti_Pygmys | -0.010551 | 0.000127 | -83.32  |
| Kuwait-B | Kuwait-S | Parsis      | Mbuti_Pygmys | -0.011009 | 0.000132 | -83.586 |
| Kuwait-B | Kuwait-S | Turkmens    | Mbuti_Pygmys | -0.010855 | 0.00013  | -83.641 |
| Kuwait-B | Kuwait-S | Kurds       | Mbuti_Pygmys | -0.011526 | 0.000137 | -84.08  |
| Kuwait-B | Kuwait-S | Tatars      | Mbuti_Pygmys | -0.01113  | 0.000132 | -84.224 |
| Kuwait-B | Kuwait-S | Pamiris     | Mbuti_Pygmys | -0.010906 | 0.000129 | -84.264 |
| Kuwait-B | Kuwait-S | Iranians    | Mbuti_Pygmys | -0.011083 | 0.000131 | -84.353 |
| Kuwait-B | Kuwait-S | Polish      | Mbuti_Pygmys | -0.011638 | 0.000138 | -84.475 |
| Kuwait-B | Kuwait-S | Tuscans     | Mbuti_Pygmys | -0.011816 | 0.00014  | -84.622 |
| Kuwait-B | Kuwait-S | Russians    | Mbuti_Pygmys | -0.011592 | 0.000137 | -84.646 |
| Kuwait-B | Kuwait-S | Egyptians   | Mbuti_Pygmys | -0.009995 | 0.000118 | -84.763 |
| Kuwait-B | Kuwait-S | Balkars     | Mbuti_Pygmys | -0.01136  | 0.000134 | -84.843 |
| Kuwait-B | Kuwait-S | Lezgins     | Mbuti_Pygmys | -0.01141  | 0.000134 | -85.027 |
| Kuwait-B | Kuwait-S | KurdishJews | Mbuti_Pygmys | -0.011665 | 0.000137 | -85.342 |

| Pop1     | Pop2     | Pop3            | Pop4         | D val     | std err  | Z val   |
|----------|----------|-----------------|--------------|-----------|----------|---------|
| Kuwait-B | Kuwait-S | IranianJewish   | Mbuti_Pygmys | -0.011606 | 0.000136 | -85.412 |
| Kuwait-B | Kuwait-S | Hungarians      | Mbuti_Pygmys | -0.011657 | 0.000136 | -85.432 |
| Kuwait-B | Kuwait-S | Orcadians       | Mbuti_Pygmys | -0.011627 | 0.000136 | -85.464 |
| Kuwait-B | Kuwait-S | Georgians       | Mbuti_Pygmys | -0.011563 | 0.000135 | -85.587 |
| Kuwait-B | Kuwait-S | Chechens        | Mbuti_Pygmys | -0.011447 | 0.000134 | -85.632 |
| Kuwait-B | Kuwait-S | Spaniards       | Mbuti_Pygmys | -0.011667 | 0.000135 | -86.285 |
| Kuwait-B | Kuwait-S | FrenchBasques   | Mbuti_Pygmys | -0.011834 | 0.000137 | -86.288 |
| Kuwait-B | Kuwait-S | Ukrainians      | Mbuti_Pygmys | -0.011537 | 0.000134 | -86.288 |
| Kuwait-B | Kuwait-S | Kumyks          | Mbuti_Pygmys | -0.011396 | 0.000132 | -86.34  |
| Kuwait-B | Kuwait-S | Turks           | Mbuti_Pygmys | -0.011456 | 0.000133 | -86.435 |
| Kuwait-B | Kuwait-S | Croatians       | Mbuti_Pygmys | -0.011706 | 0.000135 | -86.464 |
| Kuwait-B | Kuwait-S | Abkhasians      | Mbuti_Pygmys | -0.011587 | 0.000134 | -86.698 |
| Kuwait-B | Kuwait-S | Jordanians      | Mbuti_Pygmys | -0.010831 | 0.000125 | -86.718 |
| Kuwait-B | Kuwait-S | Lebanese        | Mbuti_Pygmys | -0.011318 | 0.00013  | -86.741 |
| Kuwait-B | Kuwait-S | Azeris          | Mbuti_Pygmys | -0.011366 | 0.000131 | -86.891 |
| Kuwait-B | Kuwait-S | Greeks          | Mbuti_Pygmys | -0.011785 | 0.000135 | -87.056 |
| Kuwait-B | Kuwait-S | Romanians       | Mbuti_Pygmys | -0.011655 | 0.000134 | -87.08  |
| Kuwait-B | Kuwait-S | Romanians       | Mbuti_Pygmys | -0.011655 | 0.000134 | -87.08  |
| Kuwait-B | Kuwait-S | North_Italians  | Mbuti_Pygmys | -0.011843 | 0.000136 | -87.374 |
| Kuwait-B | Kuwait-S | Syrians         | Mbuti_Pygmys | -0.011289 | 0.000128 | -88.09  |
| Kuwait-B | Kuwait-S | IraqiJewish     | Mbuti_Pygmys | -0.011731 | 0.000133 | -88.443 |
| Kuwait-B | Kuwait-S | Armenians       | Mbuti_Pygmys | -0.011674 | 0.000132 | -88.492 |
| Kuwait-B | Kuwait-S | Sardinians      | Mbuti_Pygmys | -0.011996 | 0.000135 | -88.766 |
| Kuwait-B | Kuwait-S | Palestinians    | Mbuti_Pygmys | -0.011064 | 0.000125 | -88.795 |
| Kuwait-B | Kuwait-S | AshkenaziJewish | Mbuti_Pygmys | -0.011639 | 0.00013  | -89.375 |
| Kuwait-B | Kuwait-S | Druze           | Mbuti_Pygmys | -0.011646 | 0.00013  | -89.611 |
| Kuwait-B | Kuwait-S | YemeniteJews    | Mbuti_Pygmys | -0.011786 | 0.000128 | -92.173 |
| Kuwait-B | Kuwait-S | Bedouins        | Mbuti_Pygmys | -0.011496 | 0.000123 | -93.306 |
| Kuwait-B | Kuwait-S | Saudis          | Mbuti_Pygmys | -0.012053 | 0.000128 | -93.91  |
| Kuwait-B | Kuwait-P | Mandenka        | Mbuti_Pygmys | -0.000441 | 0.000055 | -8.064  |
| Kuwait-B | Kuwait-P | Ethiopians      | Mbuti_Pygmys | -0.005417 | 0.000085 | -63.614 |
| Kuwait-B | Kuwait-P | Moroccans       | Mbuti_Pygmys | -0.008283 | 0.000113 | -73.46  |
| Kuwait-B | Kuwait-P | Onge            | Mbuti_Pygmys | -0.010426 | 0.000142 | -73.638 |
| Kuwait-B | Kuwait-P | Yemenese        | Mbuti_Pygmys | -0.009212 | 0.000123 | -74.944 |
| Kuwait-B | Kuwait-P | Samartians      | Mbuti_Pygmys | -0.011951 | 0.000156 | -76.491 |
| Kuwait-B | Kuwait-P | Karitiana       | Mbuti_Pygmys | -0.012015 | 0.000157 | -76.655 |
| Kuwait-B | Kuwait-P | Japanese        | Mbuti_Pygmys | -0.010972 | 0.000142 | -77.11  |
| Kuwait-B | Kuwait-P | Mozabites       | Mbuti_Pygmys | -0.008967 | 0.000116 | -77.333 |
| Kuwait-B | Kuwait-P | Cambodians      | Mbuti_Pygmys | -0.01084  | 0.000139 | -78.224 |
| Kuwait-B | Kuwait-P | Han             | Mbuti_Pygmys | -0.010962 | 0.00014  | -78.328 |
| Kuwait-B | Kuwait-P | SyrianJews      | Mbuti_Pygmys | -0.01212  | 0.000154 | -78.912 |
| Kuwait-B | Kuwait-P | Egyptians       | Mbuti_Pygmys | -0.009644 | 0.000119 | -80.845 |
| Kuwait-B | Kuwait-P | Kusundas        | Mbuti_Pygmys | -0.011201 | 0.000139 | -80.861 |

| Pop1     | Pop2     | Pop3          | Pop4         | D val     | std err  | Z val   |
|----------|----------|---------------|--------------|-----------|----------|---------|
| Kuwait-B | Kuwait-P | Paniya        | Mbuti_Pygmys | -0.011036 | 0.000135 | -81.863 |
| Kuwait-B | Kuwait-P | Saudis        | Mbuti_Pygmys | -0.010644 | 0.00013  | -82.119 |
| Kuwait-B | Kuwait-P | Ho            | Mbuti_Pygmys | -0.010967 | 0.000133 | -82.425 |
| Kuwait-B | Kuwait-P | Kyrgyzians    | Mbuti_Pygmys | -0.011725 | 0.000139 | -84.084 |
| Kuwait-B | Kuwait-P | Chukchis      | Mbuti_Pygmys | -0.011837 | 0.000141 | -84.129 |
| Kuwait-B | Kuwait-P | Irula         | Mbuti_Pygmys | -0.011318 | 0.000134 | -84.25  |
| Kuwait-B | Kuwait-P | Gond          | Mbuti_Pygmys | -0.011172 | 0.000132 | -84.351 |
| Kuwait-B | Kuwait-P | Bedouins      | Mbuti_Pygmys | -0.01056  | 0.000125 | -84.816 |
| Kuwait-B | Kuwait-P | YemeniteJews  | Mbuti_Pygmys | -0.011019 | 0.000129 | -85.607 |
| Kuwait-B | Kuwait-P | Chamar        | Mbuti_Pygmys | -0.011653 | 0.000136 | -85.705 |
| Kuwait-B | Kuwait-P | Jordanians    | Mbuti_Pygmys | -0.010924 | 0.000127 | -85.853 |
| Kuwait-B | Kuwait-P | Uygurs        | Mbuti_Pygmys | -0.011947 | 0.000139 | -86.058 |
| Kuwait-B | Kuwait-P | Kabardins     | Mbuti_Pygmys | -0.012819 | 0.000149 | -86.089 |
| Kuwait-B | Kuwait-P | Palestinians  | Mbuti_Pygmys | -0.011118 | 0.000128 | -86.667 |
| Kuwait-B | Kuwait-P | Tuscans       | Mbuti_Pygmys | -0.012625 | 0.000145 | -87.229 |
| Kuwait-B | Kuwait-P | Lebanese      | Mbuti_Pygmys | -0.01162  | 0.000133 | -87.458 |
| Kuwait-B | Kuwait-P | Tabasaran     | Mbuti_Pygmys | -0.012961 | 0.000148 | -87.782 |
| Kuwait-B | Kuwait-P | IranianJewish | Mbuti_Pygmys | -0.01228  | 0.00014  | -87.816 |
| Kuwait-B | Kuwait-P | Brahmins_UP   | Mbuti_Pygmys | -0.01219  | 0.000139 | -88.003 |
| Kuwait-B | Kuwait-P | Kshatriya     | Mbuti_Pygmys | -0.012208 | 0.000139 | -88.097 |
| Kuwait-B | Kuwait-P | Kurds         | Mbuti_Pygmys | -0.012672 | 0.000144 | -88.109 |
| Kuwait-B | Kuwait-P | Pashtun       | Mbuti_Pygmys | -0.012559 | 0.000142 | -88.154 |
| Kuwait-B | Kuwait-P | KurdishJews   | Mbuti_Pygmys | -0.012379 | 0.00014  | -88.242 |
| Kuwait-B | Kuwait-P | Syrians       | Mbuti_Pygmys | -0.01162  | 0.000132 | -88.28  |
| Kuwait-B | Kuwait-P | Moldavians    | Mbuti_Pygmys | -0.012807 | 0.000145 | -88.384 |
| Kuwait-B | Kuwait-P | Sardinians    | Mbuti_Pygmys | -0.012397 | 0.00014  | -88.645 |
| Kuwait-B | Kuwait-P | Nogais        | Mbuti_Pygmys | -0.012531 | 0.000141 | -88.856 |
| Kuwait-B | Kuwait-P | Spaniards     | Mbuti_Pygmys | -0.012499 | 0.00014  | -89.173 |
| Kuwait-B | Kuwait-P | FrenchBasques | Mbuti_Pygmys | -0.012665 | 0.000142 | -89.185 |
| Kuwait-B | Kuwait-P | Polish        | Mbuti_Pygmys | -0.012935 | 0.000145 | -89.228 |
| Kuwait-B | Kuwait-P | IraqiJewish   | Mbuti_Pygmys | -0.012311 | 0.000137 | -89.533 |
| Kuwait-B | Kuwait-P | Iranians      | Mbuti_Pygmys | -0.012128 | 0.000135 | -89.571 |
| Kuwait-B | Kuwait-P | Orcadians     | Mbuti_Pygmys | -0.012858 | 0.000143 | -89.712 |
| Kuwait-B | Kuwait-P | Druze         | Mbuti_Pygmys | -0.012086 | 0.000135 | -89.723 |
| Kuwait-B | Kuwait-P | Greeks        | Mbuti_Pygmys | -0.012634 | 0.000141 | -89.832 |
| Kuwait-B | Kuwait-P | Gujjar        | Mbuti_Pygmys | -0.012359 | 0.000138 | -89.881 |
| Kuwait-B | Kuwait-P | Chuvash       | Mbuti_Pygmys | -0.012578 | 0.00014  | -89.936 |
| Kuwait-B | Kuwait-P | Parsis        | Mbuti_Pygmys | -0.012404 | 0.000138 | -90.113 |
| Kuwait-B | Kuwait-P | Russians      | Mbuti_Pygmys | -0.01294  | 0.000143 | -90.285 |
| Kuwait-B | Kuwait-P | Romanians     | Mbuti_Pygmys | -0.012705 | 0.00014  | -90.436 |
| Kuwait-B | Kuwait-P | Romanians     | Mbuti_Pygmys | -0.012705 | 0.00014  | -90.436 |
| Kuwait-B | Kuwait-P | Hungarians    | Mbuti_Pygmys | -0.012805 | 0.000141 | -90.503 |
| Kuwait-B | Kuwait-P | Turkmens      | Mbuti_Pygmys | -0.012312 | 0.000136 | -90.514 |



| Pop1     | Pop2     | Pop3            | Pop4          | D val     | std err  | Z val   |
|----------|----------|-----------------|---------------|-----------|----------|---------|
| Kuwait-B | Kuwait-P | North_Italians  | Mbuti_Pygmies | -0.012647 | 0.000139 | -90.69  |
| Kuwait-B | Kuwait-P | Tajiks          | Mbuti_Pygmies | -0.012581 | 0.000138 | -90.864 |
| Kuwait-B | Kuwait-P | Tatars          | Mbuti_Pygmies | -0.012625 | 0.000139 | -90.888 |
| Kuwait-B | Kuwait-P | Croatians       | Mbuti_Pygmies | -0.012793 | 0.000141 | -90.915 |
| Kuwait-B | Kuwait-P | AshkenaziJewish | Mbuti_Pygmies | -0.012264 | 0.000135 | -90.989 |
| Kuwait-B | Kuwait-P | Azeris          | Mbuti_Pygmies | -0.012519 | 0.000137 | -91.123 |
| Kuwait-B | Kuwait-P | Turks           | Mbuti_Pygmies | -0.012532 | 0.000137 | -91.164 |
| Kuwait-B | Kuwait-P | Georgians       | Mbuti_Pygmies | -0.012779 | 0.00014  | -91.253 |
| Kuwait-B | Kuwait-P | Ukrainians      | Mbuti_Pygmies | -0.012808 | 0.00014  | -91.38  |
| Kuwait-B | Kuwait-P | Gujaratis       | Mbuti_Pygmies | -0.012134 | 0.000133 | -91.409 |
| Kuwait-B | Kuwait-P | Chechens        | Mbuti_Pygmies | -0.012925 | 0.000141 | -91.722 |
| Kuwait-B | Kuwait-P | Abkhasians      | Mbuti_Pygmies | -0.012901 | 0.000141 | -91.771 |
| Kuwait-B | Kuwait-P | Balkars         | Mbuti_Pygmies | -0.012757 | 0.000139 | -91.999 |
| Kuwait-B | Kuwait-P | Balochi         | Mbuti_Pygmies | -0.012268 | 0.000133 | -92.002 |
| Kuwait-B | Kuwait-P | Kumyks          | Mbuti_Pygmies | -0.012787 | 0.000138 | -92.381 |
| Kuwait-B | Kuwait-P | Ror             | Mbuti_Pygmies | -0.0126   | 0.000136 | -92.446 |
| Kuwait-B | Kuwait-P | Lezgins         | Mbuti_Pygmies | -0.012976 | 0.00014  | -92.468 |
| Kuwait-B | Kuwait-P | Armenians       | Mbuti_Pygmies | -0.012648 | 0.000137 | -92.55  |
| Kuwait-B | Kuwait-P | Pathan          | Mbuti_Pygmies | -0.012552 | 0.000135 | -92.939 |
| Kuwait-B | Kuwait-P | Pamiris         | Mbuti_Pygmies | -0.012793 | 0.000138 | -93.036 |

**Supplementary Table 3.**  $f_4$ -statistics for relative allele sharing of the Kuwait population subgroups to ancient West Eurasian individuals.

| Pop1     | Pop2     | Pop3             | Pop4          | D val     | std err  | Z val   |
|----------|----------|------------------|---------------|-----------|----------|---------|
| Kuwait-B | Kuwait-P | Iran_HotuIIIb    | Mbuti_Pygmies | -0.012446 | 0.000298 | -41.718 |
| Kuwait-B | Kuwait-P | Natufian         | Mbuti_Pygmies | -0.009737 | 0.000185 | -52.651 |
| Kuwait-B | Kuwait-P | Ust_Ishim        | Mbuti_Pygmies | -0.009782 | 0.000178 | -54.863 |
| Kuwait-B | Kuwait-P | Iberia_BA        | Mbuti_Pygmies | -0.012631 | 0.000226 | -55.838 |
| Kuwait-B | Kuwait-P | Kostenki14       | Mbuti_Pygmies | -0.011138 | 0.000183 | -60.786 |
| Kuwait-B | Kuwait-P | Levant_N         | Mbuti_Pygmies | -0.011009 | 0.00017  | -64.813 |
| Kuwait-B | Kuwait-P | Anatolia_ChL     | Mbuti_Pygmies | -0.012736 | 0.000196 | -64.867 |
| Kuwait-B | Kuwait-P | MA1              | Mbuti_Pygmies | -0.012685 | 0.000188 | -67.412 |
| Kuwait-B | Kuwait-P | Clovis_Anzick    | Mbuti_Pygmies | -0.011746 | 0.000174 | -67.692 |
| Kuwait-B | Kuwait-P | Switzerland_HG   | Mbuti_Pygmies | -0.01231  | 0.00018  | -68.305 |
| Kuwait-B | Kuwait-P | Anatolia_Ottoman | Mbuti_Pygmies | -0.011998 | 0.000175 | -68.744 |
| Kuwait-B | Kuwait-P | Anatolia_IA      | Mbuti_Pygmies | -0.012334 | 0.000178 | -69.484 |
| Kuwait-B | Kuwait-P | Iran_recent      | Mbuti_Pygmies | -0.012641 | 0.000181 | -69.705 |
| Kuwait-B | Kuwait-P | Steppe_IA        | Mbuti_Pygmies | -0.012901 | 0.000182 | -70.812 |
| Kuwait-B | Kuwait-P | Yamnaya_EBA      | Mbuti_Pygmies | -0.013176 | 0.000185 | -71.137 |
| Kuwait-B | Kuwait-P | Turkmenistan_IA  | Mbuti_Pygmies | -0.012874 | 0.000176 | -73.073 |
| Kuwait-B | Kuwait-P | Levant_BA        | Mbuti_Pygmies | -0.011464 | 0.000156 | -73.327 |
| Kuwait-B | Kuwait-P | Iran_N           | Mbuti_Pygmies | -0.012524 | 0.000171 | -73.413 |
| Kuwait-B | Kuwait-P | WestSiberia_HG   | Mbuti_Pygmies | -0.013052 | 0.000174 | -74.803 |
| Kuwait-B | Kuwait-P | Indus_Diaspora   | Mbuti_Pygmies | -0.012226 | 0.000159 | -76.757 |
| Kuwait-B | Kuwait-P | EHG              | Mbuti_Pygmies | -0.013078 | 0.000169 | -77.256 |
| Kuwait-B | Kuwait-P | WHG              | Mbuti_Pygmies | -0.012308 | 0.000159 | -77.528 |
| Kuwait-B | Kuwait-P | Namazga_CA       | Mbuti_Pygmies | -0.012792 | 0.000162 | -79.196 |
| Kuwait-B | Kuwait-P | CHG              | Mbuti_Pygmies | -0.012969 | 0.000161 | -80.477 |
| Kuwait-B | Kuwait-P | SHG              | Mbuti_Pygmies | -0.012701 | 0.000157 | -80.681 |
| Kuwait-B | Kuwait-P | Anatolia_EBA     | Mbuti_Pygmies | -0.012219 | 0.00015  | -81.311 |
| Kuwait-B | Kuwait-P | Armenia_EBA      | Mbuti_Pygmies | -0.012849 | 0.000157 | -82.024 |
| Kuwait-B | Kuwait-P | Steppe_LBA       | Mbuti_Pygmies | -0.012714 | 0.000154 | -82.311 |
| Kuwait-B | Kuwait-P | Armenia_ChL      | Mbuti_Pygmies | -0.012733 | 0.000154 | -82.448 |
| Kuwait-B | Kuwait-P | IranTuran_N      | Mbuti_Pygmies | -0.012839 | 0.000153 | -84.031 |
| Kuwait-B | Kuwait-P | Anatolia_MLBA    | Mbuti_Pygmies | -0.012436 | 0.000148 | -84.035 |
| Kuwait-B | Kuwait-P | Anatolia_N       | Mbuti_Pygmies | -0.012278 | 0.000145 | -84.744 |
| Kuwait-B | Kuwait-P | Iran_ChL         | Mbuti_Pygmies | -0.01262  | 0.000146 | -86.155 |
| Kuwait-B | Kuwait-P | Europe_EN        | Mbuti_Pygmies | -0.012355 | 0.000143 | -86.614 |
| Kuwait-B | Kuwait-P | IranTuran_BA     | Mbuti_Pygmies | -0.013005 | 0.000145 | -89.681 |
| Kuwait-B | Kuwait-P | SouthAsia_H      | Mbuti_Pygmies | -0.012351 | 0.000136 | -90.567 |
| Kuwait-B | Kuwait-P | Europe_LNBA      | Mbuti_Pygmies | -0.012855 | 0.000139 | -92.308 |
| Kuwait-B | Kuwait-P | Steppe_MLBA      | Mbuti_Pygmies | -0.012957 | 0.00014  | -92.503 |
| Kuwait-B | Kuwait-P | Steppe_EMBA      | Mbuti_Pygmies | -0.013235 | 0.000143 | -92.656 |
| Kuwait-B | Kuwait-P | SPGT             | Mbuti_Pygmies | -0.012574 | 0.000134 | -93.782 |

| Pop1     | Pop2     | Pop3             | Pop4          | D val     | std err  | Z val   |
|----------|----------|------------------|---------------|-----------|----------|---------|
| Kuwait-B | Kuwait-P | BMAC             | Mbuti_Pygmies | -0.012894 | 0.000136 | -94.727 |
| Kuwait-B | Kuwait-S | Iran_HotuIIIb    | Mbuti_Pygmies | -0.010315 | 0.00031  | -33.271 |
| Kuwait-B | Kuwait-S | Ust_Ishim        | Mbuti_Pygmies | -0.008655 | 0.00017  | -50.929 |
| Kuwait-B | Kuwait-S | Iberia_BA        | Mbuti_Pygmies | -0.01201  | 0.000225 | -53.48  |
| Kuwait-B | Kuwait-S | MA1              | Mbuti_Pygmies | -0.010145 | 0.000188 | -54.049 |
| Kuwait-B | Kuwait-S | Kostenki14       | Mbuti_Pygmies | -0.010133 | 0.000175 | -57.824 |
| Kuwait-B | Kuwait-S | Clovis_Anzick    | Mbuti_Pygmies | -0.009666 | 0.000166 | -58.286 |
| Kuwait-B | Kuwait-S | Anatolia_ChL     | Mbuti_Pygmies | -0.011936 | 0.000198 | -60.167 |
| Kuwait-B | Kuwait-S | Anatolia_Ottoman | Mbuti_Pygmies | -0.010556 | 0.000175 | -60.244 |
| Kuwait-B | Kuwait-S | Iran_N           | Mbuti_Pygmies | -0.01013  | 0.000167 | -60.729 |
| Kuwait-B | Kuwait-S | Natufian         | Mbuti_Pygmies | -0.011771 | 0.000194 | -60.782 |
| Kuwait-B | Kuwait-S | WestSiberia_HG   | Mbuti_Pygmies | -0.010348 | 0.000165 | -62.533 |
| Kuwait-B | Kuwait-S | Switzerland_HG   | Mbuti_Pygmies | -0.011098 | 0.000174 | -63.669 |
| Kuwait-B | Kuwait-S | Yamnaya_EBA      | Mbuti_Pygmies | -0.011056 | 0.000173 | -63.784 |
| Kuwait-B | Kuwait-S | Iran_recent      | Mbuti_Pygmies | -0.011542 | 0.000181 | -63.865 |
| Kuwait-B | Kuwait-S | Steppe_IA        | Mbuti_Pygmies | -0.011064 | 0.000173 | -63.952 |
| Kuwait-B | Kuwait-S | Indus_Diaspora   | Mbuti_Pygmies | -0.009857 | 0.000154 | -63.976 |
| Kuwait-B | Kuwait-S | Anatolia_IA      | Mbuti_Pygmies | -0.01143  | 0.000177 | -64.575 |
| Kuwait-B | Kuwait-S | EHG              | Mbuti_Pygmies | -0.010785 | 0.000163 | -66.18  |
| Kuwait-B | Kuwait-S | Turkmenistan_IA  | Mbuti_Pygmies | -0.011062 | 0.000166 | -66.652 |
| Kuwait-B | Kuwait-S | IranTuran_N      | Mbuti_Pygmies | -0.010278 | 0.000149 | -68.811 |
| Kuwait-B | Kuwait-S | CHG              | Mbuti_Pygmies | -0.010743 | 0.000155 | -69.093 |
| Kuwait-B | Kuwait-S | Namazga_CA       | Mbuti_Pygmies | -0.010547 | 0.000152 | -69.43  |
| Kuwait-B | Kuwait-S | SHG              | Mbuti_Pygmies | -0.011086 | 0.000155 | -71.497 |
| Kuwait-B | Kuwait-S | Levant_N         | Mbuti_Pygmies | -0.012051 | 0.000166 | -72.791 |
| Kuwait-B | Kuwait-S | WHG              | Mbuti_Pygmies | -0.011186 | 0.000152 | -73.634 |
| Kuwait-B | Kuwait-S | Steppe_LBA       | Mbuti_Pygmies | -0.010802 | 0.000146 | -74.236 |
| Kuwait-B | Kuwait-S | Armenia_ChL      | Mbuti_Pygmies | -0.011618 | 0.000153 | -76.005 |
| Kuwait-B | Kuwait-S | Armenia_EBA      | Mbuti_Pygmies | -0.011519 | 0.00015  | -76.776 |
| Kuwait-B | Kuwait-S | Levant_BA        | Mbuti_Pygmies | -0.012209 | 0.000159 | -76.866 |
| Kuwait-B | Kuwait-S | IranTuran_BA     | Mbuti_Pygmies | -0.010751 | 0.00014  | -77.054 |
| Kuwait-B | Kuwait-S | SouthAsia_H      | Mbuti_Pygmies | -0.010246 | 0.00013  | -78.556 |
| Kuwait-B | Kuwait-S | Anatolia_EBA     | Mbuti_Pygmies | -0.011735 | 0.000149 | -78.749 |
| Kuwait-B | Kuwait-S | Iran_ChL         | Mbuti_Pygmies | -0.011279 | 0.000143 | -79.135 |
| Kuwait-B | Kuwait-S | Anatolia_MLBA    | Mbuti_Pygmies | -0.011904 | 0.000147 | -80.929 |
| Kuwait-B | Kuwait-S | SPGT             | Mbuti_Pygmies | -0.010397 | 0.000128 | -81.142 |
| Kuwait-B | Kuwait-S | Steppe_EMBA      | Mbuti_Pygmies | -0.011055 | 0.000133 | -82.933 |
| Kuwait-B | Kuwait-S | Steppe_MLBA      | Mbuti_Pygmies | -0.011265 | 0.000133 | -84.545 |
| Kuwait-B | Kuwait-S | BMAC             | Mbuti_Pygmies | -0.010909 | 0.000128 | -85.343 |
| Kuwait-B | Kuwait-S | Europe_LNBA      | Mbuti_Pygmies | -0.011533 | 0.000134 | -85.785 |
| Kuwait-B | Kuwait-S | Anatolia_N       | Mbuti_Pygmies | -0.012307 | 0.000141 | -87.182 |
| Kuwait-B | Kuwait-S | Europe_EN        | Mbuti_Pygmies | -0.012301 | 0.00014  | -87.6   |
| Kuwait-P | Kuwait-S | SPGT             | Mbuti_Pygmies | 0.002178  | 0.000069 | 31.616  |

| Pop1            | Pop2            | Pop3             | Pop4                 | D val            | std err         | Z val          |
|-----------------|-----------------|------------------|----------------------|------------------|-----------------|----------------|
| Kuwait-P        | Kuwait-S        | SouthAsia_H      | Mbuti_Pygmies        | 0.002105         | 0.00007         | 29.992         |
| Kuwait-P        | Kuwait-S        | Steppe_EMBA      | Mbuti_Pygmies        | 0.00218          | 0.000075        | 29.145         |
| Kuwait-P        | Kuwait-S        | IranTuran_BA     | Mbuti_Pygmies        | 0.002254         | 0.00008         | 28.318         |
| Kuwait-P        | Kuwait-S        | BMAC             | Mbuti_Pygmies        | 0.001985         | 0.00007         | 28.159         |
| Kuwait-P        | Kuwait-S        | IranTuran_N      | Mbuti_Pygmies        | 0.00256          | 0.000095        | 26.937         |
| Kuwait-P        | Kuwait-S        | Indus_Diaspora   | Mbuti_Pygmies        | 0.002369         | 0.000089        | 26.628         |
| Kuwait-P        | Kuwait-S        | WestSiberia_HG   | Mbuti_Pygmies        | 0.002704         | 0.000103        | 26.236         |
| Kuwait-P        | Kuwait-S        | Namazga_CA       | Mbuti_Pygmies        | 0.002245         | 0.00009         | 25.018         |
| Kuwait-P        | Kuwait-S        | Steppe_MLBA      | Mbuti_Pygmies        | 0.001692         | 0.000072        | 23.454         |
| Kuwait-P        | Kuwait-S        | CHG              | Mbuti_Pygmies        | 0.002226         | 0.000096        | 23.284         |
| Kuwait-P        | Kuwait-S        | Steppe_LBA       | Mbuti_Pygmies        | 0.001912         | 0.000083        | 23.109         |
| Kuwait-P        | Kuwait-S        | Iran_N           | Mbuti_Pygmies        | 0.002393         | 0.000105        | 22.777         |
| Kuwait-P        | Kuwait-S        | EHG              | Mbuti_Pygmies        | 0.002293         | 0.000103        | 22.195         |
| Kuwait-P        | Kuwait-S        | MA1              | Mbuti_Pygmies        | 0.00254          | 0.000118        | 21.499         |
| Kuwait-P        | Kuwait-S        | Clovis_Anzick    | Mbuti_Pygmies        | 0.00208          | 0.000104        | 19.986         |
| Kuwait-P        | Kuwait-S        | Yamnaya_EBA      | Mbuti_Pygmies        | 0.00212          | 0.000112        | 19.008         |
| Kuwait-P        | Kuwait-S        | Europe_LNBA      | Mbuti_Pygmies        | 0.001322         | 0.000073        | 18.046         |
| Kuwait-P        | Kuwait-S        | SHG              | Mbuti_Pygmies        | 0.001616         | 0.000091        | 17.773         |
| Kuwait-P        | Kuwait-S        | Steppe_IA        | Mbuti_Pygmies        | 0.001838         | 0.000106        | 17.397         |
| Kuwait-P        | Kuwait-S        | Turkmenistan_IA  | Mbuti_Pygmies        | 0.001812         | 0.000112        | 16.204         |
| Kuwait-P        | Kuwait-S        | Iran_ChL         | Mbuti_Pygmies        | 0.001341         | 0.000086        | 15.528         |
| Kuwait-P        | Kuwait-S        | Armenia_EBA      | Mbuti_Pygmies        | 0.00133          | 0.000089        | 14.906         |
| Kuwait-P        | Kuwait-S        | Anatolia_Ottoman | Mbuti_Pygmies        | 0.001442         | 0.000105        | 13.797         |
| Kuwait-P        | Kuwait-S        | Armenia_ChL      | Mbuti_Pygmies        | 0.001115         | 0.000086        | 12.907         |
| Kuwait-P        | Kuwait-S        | WHG              | Mbuti_Pygmies        | 0.001122         | 0.000097        | 11.572         |
| Kuwait-P        | Kuwait-S        | Ust_Ishim        | Mbuti_Pygmies        | 0.001127         | 0.000106        | 10.661         |
| Kuwait-P        | Kuwait-S        | Switzerland_HG   | Mbuti_Pygmies        | 0.001212         | 0.000114        | 10.658         |
| Kuwait-P        | Kuwait-S        | Iran_HotuIIIb    | Mbuti_Pygmies        | 0.002132         | 0.000205        | 10.382         |
| Kuwait-P        | Kuwait-S        | Iran_recent      | Mbuti_Pygmies        | 0.001099         | 0.000115        | 9.591          |
| Kuwait-P        | Kuwait-S        | Kostenki14       | Mbuti_Pygmies        | 0.001004         | 0.00011         | 9.164          |
| Kuwait-P        | Kuwait-S        | Anatolia_IA      | Mbuti_Pygmies        | 0.000904         | 0.000109        | 8.283          |
| Kuwait-P        | Kuwait-S        | Anatolia_MLBA    | Mbuti_Pygmies        | 0.000532         | 0.000083        | 6.436          |
| Kuwait-P        | Kuwait-S        | Anatolia_ChL     | Mbuti_Pygmies        | 0.000799         | 0.000125        | 6.382          |
| Kuwait-P        | Kuwait-S        | Anatolia_EBA     | Mbuti_Pygmies        | 0.000484         | 0.000088        | 5.507          |
| Kuwait-P        | Kuwait-S        | Iberia_BA        | Mbuti_Pygmies        | 0.000622         | 0.000142        | 4.391          |
| Kuwait-P        | Kuwait-S        | Europe_EN        | Mbuti_Pygmies        | 0.000054         | 0.000077        | 0.694          |
| Kuwait-P        | Kuwait-S        | Anatolia_N       | Mbuti_Pygmies        | -0.000029        | 0.000077        | -0.374         |
| <b>Kuwait-P</b> | <b>Kuwait-S</b> | <b>Levant_BA</b> | <b>Mbuti_Pygmies</b> | <b>-0.000746</b> | <b>0.000096</b> | <b>-7.792</b>  |
| <b>Kuwait-P</b> | <b>Kuwait-S</b> | <b>Levant_N</b>  | <b>Mbuti_Pygmies</b> | <b>-0.001042</b> | <b>0.000098</b> | <b>-10.645</b> |
| <b>Kuwait-P</b> | <b>Kuwait-S</b> | <b>Natufian</b>  | <b>Mbuti_Pygmies</b> | <b>-0.002034</b> | <b>0.000115</b> | <b>-17.622</b> |

**Supplementary Table 4.**  $f_4$ -ratio estimates of Neanderthal ancestry in the Kuwait population.

| <b>Outgroup</b> | <b>A</b> | <b>B</b> | <b>C</b> | <b>X</b> | <b><math>\alpha</math></b> | <b>std err</b> | <b>Z Score</b> |
|-----------------|----------|----------|----------|----------|----------------------------|----------------|----------------|
| Chimp           | Altai    | Vindija  | Dinka    | Kuwait-B | 0.004001                   | 0.005513       | 0.726          |
| Chimp           | Altai    | Vindija  | Dinka    | Kuwait-P | 0.003977                   | 0.005932       | 0.67           |
| Chimp           | Altai    | Vindija  | Dinka    | Kuwait-S | 0.004917                   | 0.005941       | 0.828          |

$\alpha$  - alpha refers to the proportion of Neanderthal in each Kuwaiti subgroup.

**Supplementary Table 5.** Time of admixture estimate using ALDER.

| <b>Test Pop</b> | <b>Ref A</b> | <b>Ref B</b> | <b>P-value</b> | <b>2-Ref decay<br/>(time in gen)</b> | <b>Z-Score</b> |
|-----------------|--------------|--------------|----------------|--------------------------------------|----------------|
| Kuwait-B        | Yoruba       | Estonian     | 5.70E-41       | 7.92 ± 0.59                          | 13.54          |
| Kuwait-S        | Yoruba       | Paniya       | 1.20E-147      | 14.98 ± 0.58                         | 25.95          |
| Kuwait-P        | Yoruba       | Paniya       | 1.40E-68       | 15.41 ± 0.88                         | 17.6           |
